# Supplementary material
Source: PubMed Central journal article supplement (PMC9014477)
Supplement: NIHMS1787087-supplement-supinfo.pdf [file NIHMS1787087-supplement-supinfo.pdf]

## Randomization-Based Inference for a Marginal Treatment Effect in Stepped Wedge Cluster Randomized Trials

Dustin J. Rabideau<sup>\*1,2</sup> and Rui Wang<sup>3,4</sup>

<sup>1</sup>Biostatistics Center, Massachusetts General Hospital, Boston, Massachusetts

<sup>2</sup>Department of Medicine, Harvard Medical School, Boston, Massachusetts

<sup>3</sup>Department of Population Medicine, Harvard Pilgrim Health Care Institute and Harvard Medical School, Boston, Massachusetts

<sup>4</sup>Department of Biostatistics, Harvard T. H. Chan School of Public Health, Boston, Massachusetts

<sup>\*</sup>*email:* drabideau@mgh.harvard.edu

## A Details of Alternative Methods Using Cluster-Period Summary Statistics

We introduce some additional notation for the alternative randomization-based methods using cluster-period summary statistics we considered in our simulations and data example. Given  $N$  total clusters in the study, we use  $N_{1j}$  and  $N_{0j}$  to denote the number of clusters on treatment and control, respectively, in period  $j$ .  $Z_{ij}$  represents a single summary measure for the  $ij$ th cluster-period. For example, with continuous individual-level outcomes  $Y_{ijk}$ ,  $Z_{ij} = m_{ij}^{-1} \sum_{k=1}^{m_{ij}} Y_{ijk}$  is the sample average of the outcomes; with binary  $Y_{ijk}$ ,  $Z_{ij} = \log\{p_{ij}/(1-p_{ij})\}$  with  $p_{ij} = m_{ij}^{-1} \sum_{k=1}^{m_{ij}} Y_{ijk}$  is the empirical log odds of the outcomes.

### A.1 Nonparametric Within-Period Method, Thompson et al. (2018)

Thompson et al proposed a nonparametric within-period (NPWP) randomization-based method for analyzing SWTs. Their NPWP method compares weighted cluster-period means between treatment conditions within each period  $1 < j < J$ . The test statistic for their approach is

$$\hat{\psi} = \frac{1}{w} \sum_{1 < j < J} w_j \hat{\psi}_j, \quad (\text{S1})$$

where

$$\hat{\psi}_j = \frac{1}{N_{1j}} \sum_{i=1}^N X_{ij} Z_{ij} - \frac{1}{N_{0j}} \sum_{i=1}^N (1 - X_{ij}) Z_{ij}, \quad 1 < j < J,$$

$$w_j = \left[ \left\{ \frac{(N_{1j} - 1)s_{1j}^2 + (N_{0j} - 1)s_{0j}^2}{N_{1j} + N_{0j} - 2} \right\} \times \left( \frac{1}{N_{1j}} + \frac{1}{N_{0j}} \right) \right]^{-1}, \quad 1 < j < J,$$

with  $w = \sum_{1 < j < J} w_j$ , and where  $s_{1j}^2$  and  $s_{0j}^2$  are the empirical variances of the cluster-period summaries in the treatment and control groups, respectively. The randomization test is based

on permuting treatment assignments in accordance with the SWT design to recalculate the test statistic in (S1), i.e. using  $X_{ij} = X_{ij}^{(1)} = x_{ij}$  (the observed treatment values) to calculate the observed test statistic  $\hat{\psi}^{(1)}$ , and  $X_{ij} = X_{ij}^{(p)}$  to calculate the  $p$ th permuted test statistic  $\hat{\psi}^{(p)}$ . Randomization-based CIs can be calculated using the usual transformation approach for the continuous cluster-period summaries, i.e. to test  $H_0 : \psi = \psi_0$ , we would actually conduct a randomization test of  $H_0^* : \psi = 0$  using transformed cluster-period summaries

$$Z_{ij}^* = (Z_{ij} - \psi_0)x_{ij} + Z_{ij}(1 - x_{ij}).$$

Note, we use  $\psi$  here to distinguish it from  $\theta$ , as defined in (1) in the manuscript main text, as they are generally distinct parameters when there is a non-zero intervention effect.

## A.2 Crossover Method, Kennedy-Shaffer et al. (2020)

Kennedy-Shaffer et al proposed a crossover randomization-based method for analyzing SWTs. Their crossover method compares weighted cluster-period mean *differences* between clusters that cross over to those that do not at each crossover point, i.e. time periods  $j > 1$ . The test statistic for this approach takes a form similar to (S1), specifically,

$$\hat{\psi} = \frac{1}{w} \sum_{j>1} w_j \hat{\psi}_j,$$

but now,

$$\hat{\psi}_j = \frac{1}{N_{1j}^*} \sum_{i=1}^N X_{ij} D_{ij} - \frac{1}{N_{0j}^*} \sum_{i=1}^N (1 - X_{ij}) D_{ij}, \quad j > 1,$$

where  $D_{ij} = Z_{ij} - Z_{i(j-1)}$  represents the difference in cluster-period summaries between consecutive periods, and  $N_{1j}^* = \sum_{i=1}^N (X_{ij} - X_{i(j-1)})$  and  $N_{0j}^* = \sum_{i=1}^N \{1 - (X_{ij} - X_{i(j-1)})\}$  are the number of clusters that did or did not crossover to treatment in period  $j$ , respectively. Note, we included clusters on and off treatment in both consecutive periods in  $N_{0j}^*$  (i.e.  $\hat{\psi}$  corresponds to  $\tilde{\beta}$  from equation 12 in their paper). We applied the weights provided by Kennedy-Shaffer et al. (2020)

$$w_j = \left( \frac{1}{N_{1j}^*} + \frac{1}{N_{0j}^*} \right)^{-1},$$

which maximize efficiency when all variances of the cluster-period summaries are assumed equal. Randomization-based p-values and CIs are calculated in the same way as outlined above in Section A.1, but now using this alternative way of calculating  $\hat{\psi}$ .

## A.3 Closed-Form Permutation-Based Approach, Hughes et al. (2020)

Hughes et al proposed closed-form randomization-based expressions to estimate a vertical intervention effect (similar to that targeted by the NPWP method) and its corresponding

variance in SWTs. Their estimator was defined as

$$\hat{\psi} = \frac{\sum_{i=1}^N \sum_{j=1}^J Z_{ij}(x_{ij} - \bar{x}_j)}{N \sum_{j=1}^J \bar{x}_j(1 - \bar{x}_j)}, \quad (\text{S2})$$

where  $\bar{x}_j = N^{-1} \sum_{i=1}^N x_{ij}$  is the sample proportion of clusters under intervention in period  $j$  (i.e.  $\hat{\psi}$  corresponds to  $\hat{\delta}$  from equation 12 in their paper). Note that like the NPWP method, only cluster-period summary statistics from periods  $1 < j < J$  contribute to (S2), as the numerator term  $(x_{ij} - \bar{x}_j) = 0$  for  $j \in \{1, J\}$ . We used one of the expressions they proposed to estimate the variance of  $\hat{\psi}$ , specifically

$$\hat{v} = \left( \frac{N}{N-1} \right) \left[ \sum_{i=1}^N \left\{ \sum_{j=1}^J (Z_{ij} - x_{ij}\hat{\psi})^2 \bar{x}_j(1 - \bar{x}_j) + 2 \sum_{j < j'} (Z_{ij} - x_{ij}\hat{\psi})(Z_{ij'} - x_{ij'}\hat{\psi}) \bar{x}_j(1 - \bar{x}_{j'}) \right\} - \frac{2}{N-1} \sum_{i < i'} \sum_{j=1}^J \sum_{j'=1}^J (Z_{ij} - x_{ij}\hat{\psi})(Z_{i'j'} - x_{i'j'}\hat{\psi}) \bar{x}_{\min(j,j')}(1 - \bar{x}_{\max(j,j')}) \right] / \left\{ N \sum_{j=1}^J \bar{x}_j(1 - \bar{x}_j) \right\}^2,$$

to carry out Wald tests and calculate CIs, which demonstrated adequate performance across their simulations (i.e.  $\hat{v}$  corresponds to  $\{N/(N-1)\} \times V_{\hat{\delta}}^1(\hat{\delta})$  from equation 15 in their paper). Note, their expressions of  $\hat{\psi}$  and  $\hat{v}$  were derived assuming equal cluster-period sizes.

## B Details of Search Procedure Adapted from Garthwaite and Jones (2009)

For longer searches (e.g.  $P \geq 200,000$ ), Garthwaite and Jones (2009) proposed an improvement on the algorithm in Garthwaite (1996) by modifying the step size during later phases of the search and averaging, rather than using only the final values, for CI estimation. For example, suppose we carry out a  $P$ -step search for each bound, broken into three separate phases, with  $P = P_1 + P_2 + P_3$ . Updates are made using the same general formulas

$$U^{(p+1)} = \begin{cases} U^{(p)} - a_p(\alpha/2), & \text{if } \hat{\tau}^{(p)}(\mathbf{X}^{(p)}) > \hat{\tau}^{(p)}(\mathbf{x}) \\ U^{(p)} + a_p(1 - \alpha/2), & \text{if } \hat{\tau}^{(p)}(\mathbf{X}^{(p)}) \leq \hat{\tau}^{(p)}(\mathbf{x}) \end{cases}$$

$$L^{(p+1)} = \begin{cases} L^{(p)} + a_p(\alpha/2), & \text{if } \hat{\tau}^{(p)}(\mathbf{X}^{(p)}) < \hat{\tau}^{(p)}(\mathbf{x}) \\ L^{(p)} - a_p(1 - \alpha/2), & \text{if } \hat{\tau}^{(p)}(\mathbf{X}^{(p)}) \geq \hat{\tau}^{(p)}(\mathbf{x}), \end{cases}$$

but using a different step length  $a_p$  in each phase:

$$a_p = \begin{cases} s/p, & (\text{Phase 1}) \quad p = m, \dots, m + P_1 \\ s/(m + P_1), & (\text{Phase 2}) \quad p = m + P_1, \dots, m + P_1 + P_2 \\ s/\{p(m + P_1)/(m + P_1 + P_2)\}, & (\text{Phase 3}) \quad p = m + P_1 + P_2, \dots, m + P. \end{cases}$$

1. Phase 1 begins with  $p = m$  and  $[L^{(m)}, U^{(m)}]$  as starting values. We carry out a  $P_1$ -step search with  $a_p = s/p$ . Garthwaite and Jones (2009) suggest keeping this phase short by choosing  $P_1 = \min(5000, P/20)$ . Phase 1 ends with estimates  $[L^{(m+P_1)}, U^{(m+P_1)}]$ .
2. Phase 2 begins with  $p = m + P_1$  and  $[L^{(m+P_1)}, U^{(m+P_1)}]$  as starting values. We carry out a  $P_2$ -step search with  $a_p = s/(m + P_1)$ . Garthwaite and Jones (2009) recommend  $P_2 = 14 \times P_1$  as a reasonable choice. Phase 2 ends with estimates  $[L^{(m+P_1+P_2)}, U^{(m+P_1+P_2)}]$ .
3. Phase 3 begins with  $p = m + P_1 + P_2$  and  $[L^{(m+P_1+P_2)}, U^{(m+P_1+P_2)}]$  as starting values. We carry out a  $P_3$ -step search with  $a_p = s/\{p(m + P_1)/(m + P_1 + P_2)\}$ . Garthwaite and Jones (2009) suggest keeping this phase long; they found particularly good efficiency for  $P_3 \geq 200,000 - P_1 - P_2$ , i.e. an overall  $P \geq 200,000$ . Phase 3 ends with estimates  $[L^{(m+P)}, U^{(m+P)}]$ .

Rather than choosing the final updated values  $[L^{(m+P)}, U^{(m+P)}]$ , the unweighted averages of the final  $n$  values are taken as the final CI, i.e.  $[\bar{L}, \bar{U}]$  where

$$\bar{L} = \frac{1}{n} \sum_{p=m+P-n+1}^{m+P} L^{(p)} \quad \text{and} \quad \bar{U} = \frac{1}{n} \sum_{p=m+P-n+1}^{m+P} U^{(p)}.$$

Garthwaite and Jones (2009) suggest using  $n = P - 2P_1$ . Additional guidance about fine-tuning the algorithm, such as choosing an appropriate number of steps, starting values, or step length, can be found in Rabideau and Wang (2020), Garthwaite (1996), and Garthwaite and Jones (2009).

# C Figures

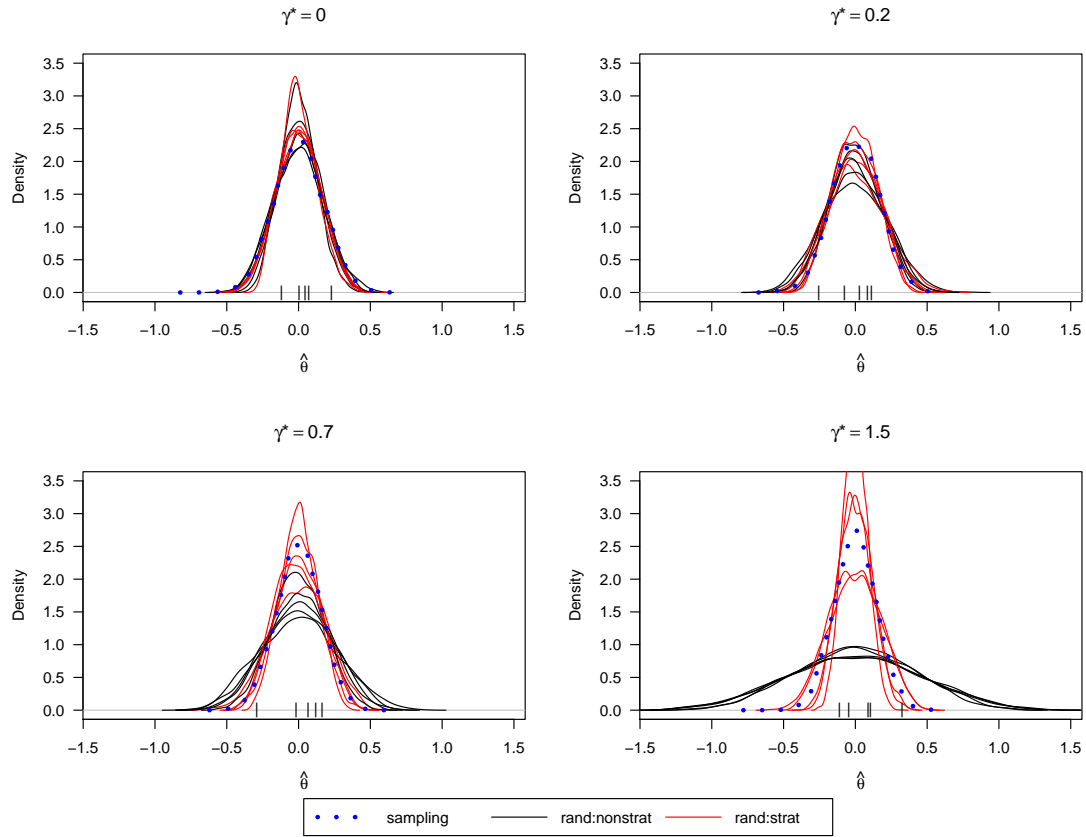

**Figure S1.** Kernel density plots of stratified (lighter red lines) and nonstratified (darker black lines) randomization distributions of  $\hat{\theta}$  with  $P = 5,000$  in 20 (5 at each level of  $\gamma^*$ ) simulated stratified SWTs. Dotted blue lines correspond to the underlying sampling distributions of  $\hat{\theta}$ . Increasing values of  $\gamma^*$  correspond to increasing strengths of  $Y$ - $Z$  association. Data sets were generated via model (7) as described in Section 3.2.1.

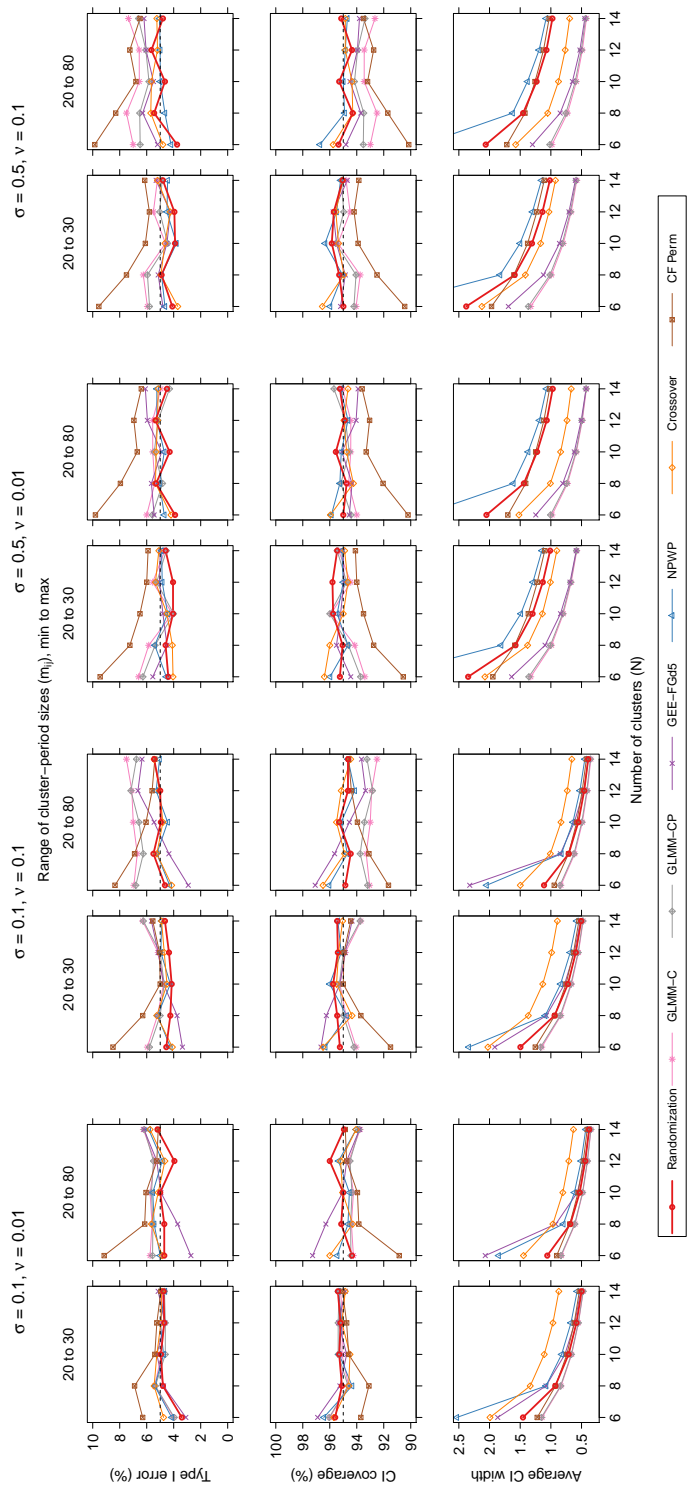

**Figure S2.** [Nonstratified randomization, **larger** ( $\sigma, \nu$ )] Simulation results across 2,000 data sets simulated via model (5) as described in Section 3.1.1 with  $\theta^* = 0$ . Methods considered included our proposed individual-level randomization-based approach (Randomization), a logistic mixed model with random cluster effects (GLMM-C), a logistic mixed model with random cluster and cluster-period effects (GLMM-CP), a marginal model fit via a small-sample adjusted generalized estimating equation (GEE-FCd5), a nonparametric within-period approach (NPWP), a crossover method (Crossover), and a closed-form permutation-based estimator (CF-Perm).

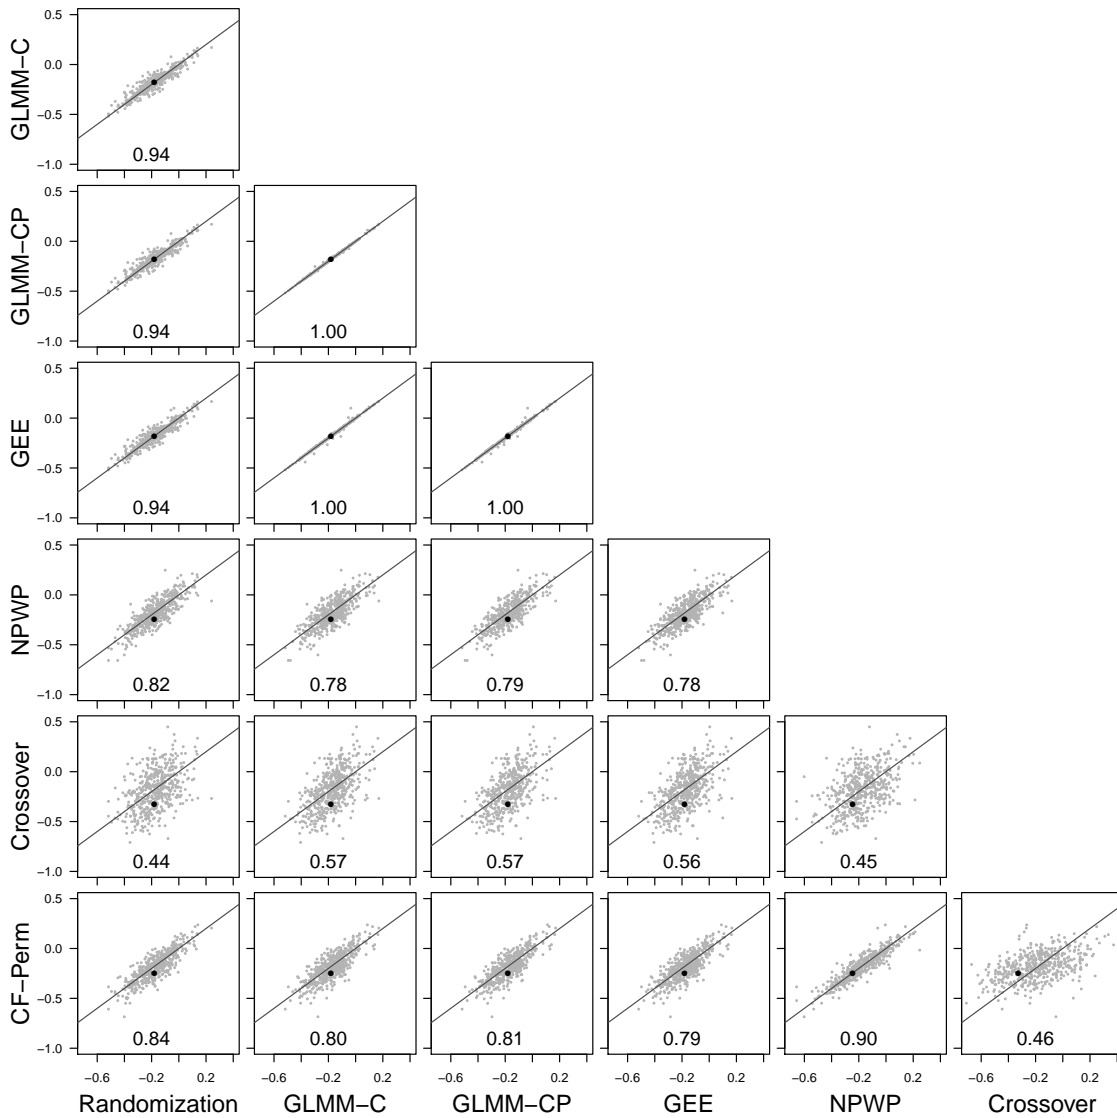

**Figure S3.** Simulated (smaller grey dots) and actual (larger black dots) log OR estimates of the intervention effect in the XpertMTB/RIF SWT. Data were generated via model (5), as described in Section 3.1.1, with parameters set at their estimated values from fitting GLMM-CP to the actual XpertMTB/RIF trial data. Lines indicate  $y = x$ . Numbers inside plot region indicate Pearson correlation coefficients. Methods considered included our proposed individual-level randomization-based approach (Randomization), a logistic mixed model with random cluster effects (GLMM-C), a logistic mixed model with random cluster and cluster-period effects (GLMM-CP), a marginal model fit via a generalized estimating equation (GEE), a small-sample adjusted GEE (GEE-FGd5), a nonparametric within-period approach (NPWP), a crossover method (Crossover), and a closed-form permutation-based estimator (CF-Perm).

## D Tables



**Table S1.** [Nonstratified randomization,  $(\sigma, \nu) = (0.1, 0.01)$ ] **Power** (%) across 2,000 data sets simulated via model (5) as described in Section 3.1.1. We considered different treatment effects ( $\theta^*$ ), cluster-period size ranges ( $m_{ij}$ ), and numbers of clusters ( $N$ ). Methods considered included our proposed individual-level randomization-based approach (Randomization), a logistic mixed model with random cluster effects (GLMM-C), a logistic mixed model with random cluster and cluster-period effects (GLMM-CP), a marginal model fit via a generalized estimating equation (GEE), a small-sample adjusted GEE (GEE-FGd5), a cluster-level non-parametric within-period approach (NPWP), a cluster-level crossover method (Crossover), and a closed-form permutation-based estimator (CF-Perm).

| $\theta^*$ | Method        | $m_{ij} \sim U\{20, 30\}$ |    |    |    |    | $m_{ij} \sim U\{20, 80\}$ |    |    |     |     |
|------------|---------------|---------------------------|----|----|----|----|---------------------------|----|----|-----|-----|
|            |               | N                         |    |    |    |    |                           |    |    |     |     |
|            |               | 6                         | 8  | 10 | 12 | 14 | 6                         | 8  | 10 | 12  | 14  |
| 0          | Randomization | 3                         | 5  | 5  | 5  | 5  | 5                         | 5  | 5  | 4   | 5   |
|            | GLMM-C        | 4                         | 5  | 5  | 5  | 5  | 6                         | 6  | 6  | 5   | 6   |
|            | GLMM-CP       | 4                         | 5  | 5  | 5  | 5  | 6                         | 6  | 6  | 5   | 6   |
|            | GEE           | 24                        | 18 | 15 | 13 | 9  | 25                        | 18 | 14 | 12  | 12  |
|            | GEE-FGd5      | 3                         | 5  | 5  | 5  | 5  | 3                         | 4  | 5  | 5   | 6   |
|            | NPWP          | 4                         | 5  | 5  | 5  | 5  | 5                         | 5  | 6  | 5   | 6   |
|            | Crossover     | 5                         | 5  | 5  | 5  | 5  | 5                         | 6  | 5  | 5   | 6   |
|            | CF-Perm       | 6                         | 7  | 5  | 5  | 5  | 9                         | 6  | 6  | 5   | 5   |
| 0.25       | Randomization | 11                        | 22 | 28 | 41 | 52 | 17                        | 31 | 47 | 63  | 76  |
|            | GLMM-C        | 15                        | 25 | 32 | 45 | 56 | 24                        | 38 | 55 | 70  | 82  |
|            | GLMM-CP       | 15                        | 25 | 32 | 45 | 56 | 23                        | 37 | 54 | 70  | 82  |
|            | GEE           | 36                        | 41 | 45 | 56 | 64 | 46                        | 53 | 65 | 76  | 85  |
|            | GEE-FGd5      | 6                         | 15 | 25 | 39 | 49 | 8                         | 24 | 42 | 61  | 76  |
|            | NPWP          | 10                        | 17 | 23 | 36 | 45 | 15                        | 24 | 39 | 52  | 69  |
|            | Crossover     | 9                         | 15 | 17 | 20 | 24 | 13                        | 20 | 27 | 32  | 37  |
|            | CF-Perm       | 18                        | 24 | 30 | 42 | 52 | 26                        | 33 | 48 | 60  | 74  |
| 0.5        | Randomization | 30                        | 63 | 83 | 93 | 99 | 52                        | 86 | 97 | 100 | 100 |
|            | GLMM-C        | 43                        | 70 | 86 | 95 | 99 | 70                        | 91 | 99 | 100 | 100 |
|            | GLMM-CP       | 42                        | 69 | 86 | 95 | 99 | 70                        | 91 | 99 | 100 | 100 |
|            | GEE           | 63                        | 80 | 90 | 96 | 99 | 82                        | 95 | 99 | 100 | 100 |
|            | GEE-FGd5      | 18                        | 51 | 75 | 91 | 98 | 31                        | 74 | 95 | 99  | 100 |
|            | NPWP          | 26                        | 55 | 74 | 89 | 96 | 44                        | 77 | 93 | 98  | 100 |
|            | Crossover     | 20                        | 40 | 51 | 64 | 72 | 35                        | 62 | 77 | 85  | 93  |
|            | CF-Perm       | 42                        | 68 | 83 | 94 | 98 | 65                        | 86 | 96 | 99  | 100 |

**Table S2.** [Nonstratified randomization,  $(\sigma, \nu) = (0.1, 0.01)$ ] **CI coverage (%)** across 2,000 data sets simulated via model (5) as described in Section 3.1.1. We considered different treatment effects ( $\theta^*$ ), cluster-period size ranges ( $m_{ij}$ ), and numbers of clusters ( $N$ ). Methods considered included our proposed individual-level randomization-based approach (Randomization), a logistic mixed model with random cluster effects (GLMM-C), a logistic mixed model with random cluster and cluster-period effects (GLMM-CP), a marginal model fit via a generalized estimating equation (GEE), a small-sample adjusted GEE (GEE-FGd5), a cluster-level nonparametric within-period approach (NPWP), a cluster-level crossover method (Crossover), and a closed-form permutation-based estimator (CF-Perm).

| $\theta^*$ | Method        | $m_{ij} \sim U\{20, 30\}$ |    |    |    |    | $m_{ij} \sim U\{20, 80\}$ |    |    |    |    |
|------------|---------------|---------------------------|----|----|----|----|---------------------------|----|----|----|----|
|            |               | N                         |    |    |    |    |                           |    |    |    |    |
|            |               | 6                         | 8  | 10 | 12 | 14 | 6                         | 8  | 10 | 12 | 14 |
| 0          | Randomization | 96                        | 95 | 95 | 95 | 95 | 94                        | 95 | 95 | 96 | 95 |
|            | GLMM-C        | 96                        | 95 | 95 | 95 | 95 | 94                        | 94 | 94 | 95 | 94 |
|            | GLMM-CP       | 96                        | 95 | 95 | 95 | 95 | 94                        | 94 | 94 | 95 | 94 |
|            | GEE           | 76                        | 82 | 85 | 87 | 91 | 75                        | 82 | 86 | 88 | 88 |
|            | GEE-FGd5      | 97                        | 95 | 95 | 95 | 95 | 97                        | 96 | 95 | 95 | 94 |
|            | NPWP          | 96                        | 94 | 95 | 95 | 95 | 95                        | 95 | 95 | 95 | 94 |
|            | Crossover     | 96                        | 95 | 94 | 95 | 95 | 96                        | 94 | 95 | 95 | 94 |
|            | CF-Perm       | 94                        | 93 | 95 | 95 | 95 | 91                        | 94 | 94 | 95 | 95 |
| 0.25       | Randomization | 95                        | 96 | 96 | 96 | 96 | 95                        | 95 | 95 | 95 | 95 |
|            | GLMM-C        | 94                        | 95 | 95 | 95 | 95 | 94                        | 95 | 94 | 93 | 94 |
|            | GLMM-CP       | 94                        | 95 | 95 | 95 | 95 | 94                        | 95 | 94 | 94 | 94 |
|            | GEE           | 76                        | 83 | 86 | 89 | 90 | 76                        | 82 | 85 | 86 | 88 |
|            | GEE-FGd5      | 97                        | 96 | 95 | 95 | 95 | 97                        | 96 | 95 | 93 | 94 |
|            | NPWP          | 96                        | 95 | 95 | 95 | 96 | 96                        | 94 | 95 | 95 | 94 |
|            | Crossover     | 96                        | 94 | 94 | 96 | 95 | 96                        | 95 | 95 | 95 | 95 |
|            | CF-Perm       | 92                        | 94 | 94 | 95 | 96 | 92                        | 93 | 94 | 94 | 94 |
| 0.5        | Randomization | 95                        | 95 | 95 | 95 | 95 | 94                        | 95 | 95 | 95 | 95 |
|            | GLMM-C        | 95                        | 95 | 94 | 94 | 95 | 94                        | 94 | 94 | 94 | 94 |
|            | GLMM-CP       | 95                        | 95 | 94 | 94 | 95 | 94                        | 94 | 95 | 94 | 94 |
|            | GEE           | 77                        | 84 | 84 | 87 | 89 | 76                        | 81 | 86 | 88 | 88 |
|            | GEE-FGd5      | 97                        | 97 | 95 | 94 | 95 | 97                        | 96 | 96 | 94 | 94 |
|            | NPWP          | 96                        | 96 | 95 | 95 | 95 | 97                        | 95 | 95 | 94 | 94 |
|            | Crossover     | 97                        | 95 | 95 | 95 | 94 | 96                        | 95 | 95 | 95 | 95 |
|            | CF-Perm       | 91                        | 94 | 93 | 94 | 95 | 92                        | 93 | 94 | 94 | 94 |

**Table S3.** [Nonstratified randomization,  $(\sigma, \nu) = (0.1, 0.01)$ ] **Average CI width** across 2,000 data sets simulated via model (5) as described in Section 3.1.1. We considered different treatment effects ( $\theta^*$ ), cluster-period size ranges ( $m_{ij}$ ), and numbers of clusters ( $N$ ). Methods considered included our proposed individual-level randomization-based approach (Randomization), a logistic mixed model with random cluster effects (GLMM-C), a logistic mixed model with random cluster and cluster-period effects (GLMM-CP), a marginal model fit via a generalized estimating equation (GEE), a small-sample adjusted GEE (GEE-FGd5), a cluster-level nonparametric within-period approach (NPWP), a cluster-level crossover method (Crossover), and a closed-form permutation-based estimator (CF-Perm).

| $\theta^*$ | Method        | $m_{ij} \sim U\{20, 30\}$ |      |      |      |      | $m_{ij} \sim U\{20, 80\}$ |      |      |      |      |
|------------|---------------|---------------------------|------|------|------|------|---------------------------|------|------|------|------|
|            |               | N                         |      |      |      |      | N                         |      |      |      |      |
|            |               | 6                         | 8    | 10   | 12   | 14   | 6                         | 8    | 10   | 12   | 14   |
| 0          | Randomization | 1.45                      | 0.93 | 0.71 | 0.58 | 0.50 | 1.06                      | 0.68 | 0.53 | 0.44 | 0.38 |
|            | GLMM-C        | 1.14                      | 0.83 | 0.66 | 0.55 | 0.47 | 0.83                      | 0.61 | 0.48 | 0.40 | 0.35 |
|            | GLMM-CP       | 1.15                      | 0.84 | 0.67 | 0.55 | 0.47 | 0.84                      | 0.61 | 0.48 | 0.41 | 0.35 |
|            | GEE           | 0.81                      | 0.66 | 0.55 | 0.47 | 0.42 | 0.61                      | 0.48 | 0.40 | 0.35 | 0.31 |
|            | GEE-FGd5      | 1.87                      | 1.08 | 0.77 | 0.61 | 0.51 | 2.07                      | 0.92 | 0.57 | 0.45 | 0.38 |
|            | NPWP          | 2.53                      | 1.08 | 0.82 | 0.67 | 0.57 | 1.85                      | 0.80 | 0.62 | 0.51 | 0.43 |
|            | Crossover     | 1.99                      | 1.34 | 1.11 | 0.97 | 0.87 | 1.45                      | 0.97 | 0.81 | 0.71 | 0.63 |
|            | CF-Perm       | 1.22                      | 0.92 | 0.74 | 0.62 | 0.54 | 0.91                      | 0.69 | 0.56 | 0.47 | 0.41 |
| 0.25       | Randomization | 1.43                      | 0.91 | 0.70 | 0.57 | 0.48 | 1.03                      | 0.67 | 0.52 | 0.43 | 0.37 |
|            | GLMM-C        | 1.11                      | 0.81 | 0.65 | 0.54 | 0.46 | 0.80                      | 0.59 | 0.47 | 0.39 | 0.34 |
|            | GLMM-CP       | 1.12                      | 0.82 | 0.65 | 0.54 | 0.46 | 0.81                      | 0.60 | 0.47 | 0.40 | 0.34 |
|            | GEE           | 0.80                      | 0.65 | 0.54 | 0.47 | 0.41 | 0.59                      | 0.47 | 0.40 | 0.34 | 0.30 |
|            | GEE-FGd5      | 1.92                      | 1.15 | 0.75 | 0.60 | 0.50 | 2.12                      | 0.95 | 0.56 | 0.44 | 0.37 |
|            | NPWP          | 2.38                      | 1.05 | 0.80 | 0.65 | 0.55 | 2.03                      | 0.78 | 0.60 | 0.49 | 0.42 |
|            | Crossover     | 1.93                      | 1.29 | 1.07 | 0.94 | 0.84 | 1.39                      | 0.95 | 0.78 | 0.68 | 0.62 |
|            | CF-Perm       | 1.19                      | 0.89 | 0.72 | 0.60 | 0.51 | 0.88                      | 0.67 | 0.54 | 0.45 | 0.40 |
| 0.5        | Randomization | 1.39                      | 0.88 | 0.68 | 0.56 | 0.48 | 1.01                      | 0.65 | 0.51 | 0.42 | 0.36 |
|            | GLMM-C        | 1.09                      | 0.80 | 0.63 | 0.53 | 0.45 | 0.79                      | 0.58 | 0.46 | 0.39 | 0.33 |
|            | GLMM-CP       | 1.11                      | 0.81 | 0.64 | 0.53 | 0.46 | 0.80                      | 0.59 | 0.47 | 0.39 | 0.34 |
|            | GEE           | 0.79                      | 0.63 | 0.53 | 0.45 | 0.40 | 0.58                      | 0.46 | 0.39 | 0.34 | 0.30 |
|            | GEE-FGd5      | 2.00                      | 1.04 | 0.73 | 0.58 | 0.49 | 2.12                      | 0.85 | 0.55 | 0.43 | 0.36 |
|            | NPWP          | 2.52                      | 1.01 | 0.78 | 0.64 | 0.54 | 2.46                      | 0.76 | 0.59 | 0.48 | 0.41 |
|            | Crossover     | 1.89                      | 1.25 | 1.04 | 0.91 | 0.82 | 1.39                      | 0.93 | 0.77 | 0.67 | 0.60 |
|            | CF-Perm       | 1.16                      | 0.87 | 0.70 | 0.59 | 0.51 | 0.87                      | 0.66 | 0.53 | 0.45 | 0.39 |

**Table S4.** [Nonstratified randomization,  $(\sigma, \nu) = (0.1, 0.01)$ ] **Average CI width** across 2,000 data sets simulated via model (5) as described in Section 3.1.1 with  $\theta^* = 0$ . We considered different **fixed and variable** cluster-period size ranges ( $m_{ij}$ ) and numbers of clusters ( $N$ ). Methods considered included our proposed individual-level randomization-based approach (Randomization), a logistic mixed model with random cluster effects (GLMM-C), a logistic mixed model with random cluster and cluster-period effects (GLMM-CP), a marginal model fit via a generalized estimating equation (GEE), a small-sample adjusted GEE (GEE-FGd5), a cluster-level nonparametric within-period approach (NPWP), a cluster-level crossover method (Crossover), and a closed-form permutation-based estimator (CF-Perm).

| Method        | Fixed<br>$m_{ij} = 25$ |      |      |      |      | Variable<br>$m_{ij} \sim U\{20, 30\}$ |      |      |      |      |
|---------------|------------------------|------|------|------|------|---------------------------------------|------|------|------|------|
|               | N                      |      |      |      |      |                                       |      |      |      |      |
|               | 6                      | 8    | 10   | 12   | 14   | 6                                     | 8    | 10   | 12   | 14   |
| Randomization | 1.44                   | 0.93 | 0.71 | 0.58 | 0.50 | 1.45                                  | 0.93 | 0.71 | 0.58 | 0.50 |
| GLMM-C        | 1.14                   | 0.83 | 0.66 | 0.55 | 0.47 | 1.14                                  | 0.83 | 0.66 | 0.55 | 0.47 |
| GLMM-CP       | 1.15                   | 0.84 | 0.67 | 0.55 | 0.47 | 1.15                                  | 0.84 | 0.67 | 0.55 | 0.47 |
| GEE           | 0.82                   | 0.66 | 0.55 | 0.47 | 0.42 | 0.81                                  | 0.66 | 0.55 | 0.47 | 0.42 |
| GEE-FGd5      | 1.76                   | 1.05 | 0.77 | 0.61 | 0.51 | 1.87                                  | 1.08 | 0.77 | 0.61 | 0.51 |
| NPWP          | 2.59                   | 1.07 | 0.82 | 0.67 | 0.57 | 2.53                                  | 1.08 | 0.82 | 0.67 | 0.57 |
| Crossover     | 1.98                   | 1.33 | 1.09 | 0.96 | 0.86 | 1.99                                  | 1.34 | 1.11 | 0.97 | 0.87 |
| CF-Perm       | 1.20                   | 0.92 | 0.73 | 0.61 | 0.53 | 1.22                                  | 0.92 | 0.74 | 0.62 | 0.54 |
|               | $m_{ij} = 50$          |      |      |      |      | $m_{ij} = 20 \text{ to } 80$          |      |      |      |      |
| Randomization | 1.01                   | 0.67 | 0.53 | 0.43 | 0.37 | 1.06                                  | 0.68 | 0.53 | 0.44 | 0.38 |
| GLMM-C        | 0.81                   | 0.60 | 0.48 | 0.40 | 0.34 | 0.83                                  | 0.61 | 0.48 | 0.40 | 0.35 |
| GLMM-CP       | 0.82                   | 0.60 | 0.48 | 0.40 | 0.35 | 0.84                                  | 0.61 | 0.48 | 0.41 | 0.35 |
| GEE           | 0.59                   | 0.48 | 0.41 | 0.35 | 0.31 | 0.61                                  | 0.48 | 0.40 | 0.35 | 0.31 |
| GEE-FGd5      | 1.23                   | 0.74 | 0.55 | 0.44 | 0.37 | 2.07                                  | 0.92 | 0.57 | 0.45 | 0.38 |
| NPWP          | 1.85                   | 0.75 | 0.59 | 0.48 | 0.41 | 1.85                                  | 0.80 | 0.62 | 0.51 | 0.43 |
| Crossover     | 1.32                   | 0.89 | 0.73 | 0.64 | 0.58 | 1.45                                  | 0.97 | 0.81 | 0.71 | 0.63 |
| CF-Perm       | 0.84                   | 0.64 | 0.52 | 0.44 | 0.38 | 0.91                                  | 0.69 | 0.56 | 0.47 | 0.41 |

**Table S5.** [Nonstratified randomization, larger  $(\sigma, \nu)$ ] **Type I error** (%) across 2,000 data sets simulated via model (5) as described in Section 3.1.1 with  $\theta^* = 0$ . We considered different cluster-period size ranges ( $m_{ij}$ ) and numbers of clusters ( $N$ ). Methods considered included our proposed individual-level randomization-based approach (Randomization), a logistic mixed model with random cluster effects (GLMM-C), a logistic mixed model with random cluster and cluster-period effects (GLMM-CP), a marginal model fit via a generalized estimating equation (GEE), a small-sample adjusted GEE (GEE-FGd5), a cluster-level non-parametric within-period approach (NPWP), a cluster-level crossover method (Crossover), and a closed-form permutation-based estimator (CF-Perm).

| $\sigma$ | $\nu$ | Method        | $m_{ij} \sim U\{20, 30\}$ |    |    |    |    | $m_{ij} \sim U\{20, 80\}$ |    |    |    |    |
|----------|-------|---------------|---------------------------|----|----|----|----|---------------------------|----|----|----|----|
|          |       |               | N                         |    |    |    |    |                           |    |    |    |    |
|          |       |               | 6                         | 8  | 10 | 12 | 14 | 6                         | 8  | 10 | 12 | 14 |
| 0.1      | 0.01  | Randomization | 3                         | 5  | 5  | 5  | 5  | 5                         | 5  | 5  | 4  | 5  |
|          |       | GLMM-C        | 4                         | 5  | 5  | 5  | 5  | 6                         | 6  | 6  | 5  | 6  |
|          |       | GLMM-CP       | 4                         | 5  | 5  | 5  | 5  | 6                         | 6  | 6  | 5  | 6  |
|          |       | GEE           | 24                        | 18 | 15 | 13 | 9  | 25                        | 18 | 14 | 12 | 12 |
|          |       | GEE-FGd5      | 3                         | 5  | 5  | 5  | 5  | 3                         | 4  | 5  | 5  | 6  |
|          |       | NPWP          | 4                         | 5  | 5  | 5  | 5  | 5                         | 5  | 6  | 5  | 6  |
|          |       | Crossover     | 5                         | 5  | 5  | 5  | 5  | 5                         | 6  | 5  | 5  | 6  |
|          |       | CF-Perm       | 6                         | 7  | 5  | 5  | 5  | 9                         | 6  | 6  | 5  | 5  |
| 0.1      | 0.1   | Randomization | 5                         | 4  | 4  | 4  | 5  | 5                         | 6  | 5  | 5  | 5  |
|          |       | GLMM-C        | 6                         | 5  | 5  | 5  | 6  | 7                         | 7  | 7  | 7  | 8  |
|          |       | GLMM-CP       | 6                         | 5  | 5  | 5  | 6  | 7                         | 6  | 7  | 7  | 7  |
|          |       | GEE           | 24                        | 17 | 14 | 12 | 11 | 25                        | 17 | 14 | 13 | 12 |
|          |       | GEE-FGd5      | 3                         | 4  | 5  | 5  | 6  | 3                         | 4  | 5  | 7  | 6  |
|          |       | NPWP          | 4                         | 5  | 4  | 5  | 5  | 4                         | 5  | 4  | 5  | 5  |
|          |       | Crossover     | 4                         | 5  | 4  | 5  | 5  | 4                         | 5  | 5  | 5  | 5  |
|          |       | CF-Perm       | 8                         | 6  | 5  | 5  | 6  | 8                         | 7  | 6  | 6  | 5  |
| 0.5      | 0.01  | Randomization | 4                         | 5  | 4  | 4  | 5  | 4                         | 5  | 4  | 5  | 4  |
|          |       | GLMM-C        | 7                         | 6  | 4  | 6  | 5  | 6                         | 5  | 6  | 6  | 5  |
|          |       | GLMM-CP       | 6                         | 5  | 4  | 5  | 5  | 6                         | 5  | 5  | 5  | 4  |
|          |       | GEE           | 20                        | 14 | 11 | 10 | 9  | 20                        | 15 | 12 | 11 | 11 |
|          |       | GEE-FGd5      | 6                         | 4  | 5  | 5  | 5  | 5                         | 6  | 5  | 6  | 6  |
|          |       | NPWP          | 5                         | 5  | 4  | 5  | 5  | 5                         | 5  | 5  | 5  | 5  |
|          |       | Crossover     | 4                         | 4  | 4  | 5  | 5  | 4                         | 5  | 5  | 5  | 5  |
|          |       | CF-Perm       | 9                         | 7  | 6  | 6  | 6  | 10                        | 8  | 7  | 7  | 6  |
| 0.5      | 0.1   | Randomization | 4                         | 5  | 4  | 4  | 5  | 4                         | 5  | 5  | 6  | 5  |
|          |       | GLMM-C        | 6                         | 6  | 5  | 6  | 5  | 7                         | 8  | 7  | 7  | 7  |
|          |       | GLMM-CP       | 6                         | 6  | 4  | 5  | 5  | 6                         | 7  | 6  | 6  | 7  |
|          |       | GEE           | 19                        | 15 | 11 | 10 | 10 | 20                        | 16 | 12 | 11 | 11 |
|          |       | GEE-FGd5      | 5                         | 5  | 4  | 4  | 5  | 5                         | 6  | 6  | 6  | 6  |
|          |       | NPWP          | 5                         | 5  | 4  | 4  | 4  | 4                         | 5  | 5  | 5  | 5  |
|          |       | Crossover     | 4                         | 5  | 5  | 4  | 5  | 5                         | 6  | 6  | 5  | 5  |
|          |       | CF-Perm       | 10                        | 8  | 6  | 6  | 6  | 10                        | 8  | 7  | 7  | 6  |

**Table S6.** [Nonstratified randomization, **larger**  $(\sigma, \nu)$ ] **CI coverage** (%) across 2,000 data sets simulated via model (5) as described in Section 3.1.1 with  $\theta^* = 0$ . We considered different cluster-period size ranges ( $m_{ij}$ ) and numbers of clusters ( $N$ ). Methods considered included our proposed individual-level randomization-based approach (Randomization), a logistic mixed model with random cluster effects (GLMM-C), a logistic mixed model with random cluster and cluster-period effects (GLMM-CP), a marginal model fit via a generalized estimating equation (GEE), a small-sample adjusted GEE (GEE-FGd5), a cluster-level non-parametric within-period approach (NPWP), a cluster-level crossover method (Crossover), and a closed-form permutation-based estimator (CF-Perm).

| $\sigma$ | $\nu$ | Method        | $m_{ij} \sim U\{20, 30\}$ |    |    |    |    | $m_{ij} \sim U\{20, 80\}$ |    |    |    |    |
|----------|-------|---------------|---------------------------|----|----|----|----|---------------------------|----|----|----|----|
|          |       |               | N                         |    |    |    |    |                           |    |    |    |    |
|          |       |               | 6                         | 8  | 10 | 12 | 14 | 6                         | 8  | 10 | 12 | 14 |
| 0.1      | 0.01  | Randomization | 96                        | 95 | 95 | 95 | 95 | 94                        | 95 | 95 | 96 | 95 |
|          |       | GLMM-C        | 96                        | 95 | 95 | 95 | 95 | 94                        | 94 | 94 | 95 | 94 |
|          |       | GLMM-CP       | 96                        | 95 | 95 | 95 | 95 | 94                        | 94 | 94 | 95 | 94 |
|          |       | GEE           | 76                        | 82 | 85 | 87 | 91 | 75                        | 82 | 86 | 88 | 88 |
|          |       | GEE-FGd5      | 97                        | 95 | 95 | 95 | 95 | 97                        | 96 | 95 | 95 | 94 |
|          |       | NPWP          | 96                        | 94 | 95 | 95 | 95 | 95                        | 95 | 95 | 95 | 94 |
|          |       | Crossover     | 96                        | 95 | 94 | 95 | 95 | 96                        | 94 | 95 | 95 | 94 |
|          |       | CF-Perm       | 94                        | 93 | 95 | 95 | 95 | 91                        | 94 | 94 | 95 | 95 |
| 0.1      | 0.1   | Randomization | 95                        | 95 | 96 | 95 | 95 | 94                        | 95 | 95 | 95 |    |
|          |       | GLMM-C        | 94                        | 95 | 95 | 95 | 94 | 93                        | 93 | 93 | 92 |    |
|          |       | GLMM-CP       | 94                        | 95 | 95 | 95 | 94 | 93                        | 94 | 93 | 93 |    |
|          |       | GEE           | 76                        | 83 | 86 | 88 | 89 | 75                        | 83 | 86 | 87 | 88 |
|          |       | GEE-FGd5      | 97                        | 96 | 95 | 95 | 94 | 97                        | 96 | 95 | 93 | 94 |
|          |       | NPWP          | 96                        | 95 | 96 | 95 | 95 | 96                        | 95 | 95 | 94 | 95 |
|          |       | Crossover     | 96                        | 94 | 96 | 95 | 95 | 96                        | 95 | 96 | 95 | 94 |
|          |       | CF-Perm       | 92                        | 94 | 95 | 95 | 94 | 92                        | 93 | 94 | 94 | 95 |
| 0.5      | 0.01  | Randomization | 95                        | 95 | 96 | 96 | 95 | 95                        | 95 | 96 | 95 | 95 |
|          |       | GLMM-C        | 93                        | 94 | 96 | 94 | 95 | 94                        | 95 | 94 | 94 | 95 |
|          |       | GLMM-CP       | 94                        | 95 | 96 | 95 | 95 | 94                        | 95 | 95 | 95 | 96 |
|          |       | GEE           | 80                        | 86 | 89 | 90 | 91 | 80                        | 85 | 88 | 89 | 89 |
|          |       | GEE-FGd5      | 94                        | 96 | 95 | 95 | 95 | 95                        | 94 | 95 | 94 | 94 |
|          |       | NPWP          | 96                        | 95 | 95 | 95 | 95 | 96                        | 95 | 95 | 95 | 95 |
|          |       | Crossover     | 96                        | 96 | 95 | 95 | 95 | 96                        | 94 | 95 | 95 | 95 |
|          |       | CF-Perm       | 91                        | 93 | 94 | 94 | 94 | 90                        | 92 | 93 | 93 | 94 |
| 0.5      | 0.1   | Randomization | 95                        | 95 | 96 | 96 | 95 | 95                        | 94 | 95 | 94 | 95 |
|          |       | GLMM-C        | 94                        | 94 | 95 | 94 | 95 | 93                        | 92 | 93 | 93 | 93 |
|          |       | GLMM-CP       | 94                        | 94 | 96 | 95 | 95 | 94                        | 93 | 94 | 94 | 93 |
|          |       | GEE           | 81                        | 85 | 89 | 90 | 90 | 80                        | 84 | 88 | 89 | 89 |
|          |       | GEE-FGd5      | 95                        | 95 | 96 | 96 | 95 | 95                        | 94 | 94 | 94 | 94 |
|          |       | NPWP          | 96                        | 95 | 96 | 96 | 95 | 97                        | 95 | 95 | 95 | 95 |
|          |       | Crossover     | 97                        | 95 | 95 | 96 | 95 | 96                        | 94 | 94 | 95 | 95 |
|          |       | CF-Perm       | 90                        | 92 | 94 | 94 | 94 | 90                        | 92 | 93 | 93 | 94 |

**Table S7.** [Nonstratified randomization, **larger**  $(\sigma, \nu)$ ] **Average CI width** across 2,000 data sets simulated via model (5) as described in Section 3.1.1 with  $\theta^* = 0$ . We considered different cluster-period size ranges ( $m_{ij}$ ) and numbers of clusters ( $N$ ). Methods considered included our proposed individual-level randomization-based approach (Randomization), a logistic mixed model with random cluster effects (GLMM-C), a logistic mixed model with random cluster and cluster-period effects (GLMM-CP), a marginal model fit via a generalized estimating equation (GEE), a small-sample adjusted GEE (GEE-FGd5), a cluster-level non-parametric within-period approach (NPWP), a cluster-level crossover method (Crossover), and a closed-form permutation-based estimator (CF-Perm).

| $\sigma$ | $\nu$ | Method        | $m_{ij} \sim U\{20, 30\}$ |      |      |      |      | $m_{ij} \sim U\{20, 80\}$ |      |      |      |      |
|----------|-------|---------------|---------------------------|------|------|------|------|---------------------------|------|------|------|------|
|          |       |               | N                         |      |      |      |      | N                         |      |      |      |      |
|          |       |               | 6                         | 8    | 10   | 12   | 14   | 6                         | 8    | 10   | 12   | 14   |
| 0.1      | 0.01  | Randomization | 1.45                      | 0.93 | 0.71 | 0.58 | 0.50 | 1.06                      | 0.68 | 0.53 | 0.44 | 0.38 |
|          |       | GLMM-C        | 1.14                      | 0.83 | 0.66 | 0.55 | 0.47 | 0.83                      | 0.61 | 0.48 | 0.40 | 0.35 |
|          |       | GLMM-CP       | 1.15                      | 0.84 | 0.67 | 0.55 | 0.47 | 0.84                      | 0.61 | 0.48 | 0.41 | 0.35 |
|          |       | GEE           | 0.81                      | 0.66 | 0.55 | 0.47 | 0.42 | 0.61                      | 0.48 | 0.40 | 0.35 | 0.31 |
|          |       | GEE-FGd5      | 1.87                      | 1.08 | 0.77 | 0.61 | 0.51 | 2.07                      | 0.92 | 0.57 | 0.45 | 0.38 |
|          |       | NPWP          | 2.53                      | 1.08 | 0.82 | 0.67 | 0.57 | 1.85                      | 0.80 | 0.62 | 0.51 | 0.43 |
|          |       | Crossover     | 1.99                      | 1.34 | 1.11 | 0.97 | 0.87 | 1.45                      | 0.97 | 0.81 | 0.71 | 0.63 |
|          |       | CF-Perm       | 1.22                      | 0.92 | 0.74 | 0.62 | 0.54 | 0.91                      | 0.69 | 0.56 | 0.47 | 0.41 |
| 0.1      | 0.1   | Randomization | 1.50                      | 0.94 | 0.72 | 0.59 | 0.51 | 1.11                      | 0.71 | 0.55 | 0.46 | 0.39 |
|          |       | GLMM-C        | 1.15                      | 0.84 | 0.66 | 0.55 | 0.47 | 0.84                      | 0.61 | 0.49 | 0.41 | 0.35 |
|          |       | GLMM-CP       | 1.17                      | 0.85 | 0.67 | 0.56 | 0.48 | 0.85                      | 0.62 | 0.50 | 0.41 | 0.36 |
|          |       | GEE           | 0.83                      | 0.66 | 0.56 | 0.48 | 0.42 | 0.62                      | 0.50 | 0.42 | 0.36 | 0.32 |
|          |       | GEE-FGd5      | 1.91                      | 1.07 | 0.78 | 0.62 | 0.52 | 2.32                      | 0.84 | 0.62 | 0.46 | 0.39 |
|          |       | NPWP          | 2.34                      | 1.09 | 0.84 | 0.68 | 0.58 | 2.05                      | 0.83 | 0.64 | 0.53 | 0.45 |
|          |       | Crossover     | 2.03                      | 1.37 | 1.13 | 0.99 | 0.89 | 1.50                      | 1.01 | 0.83 | 0.73 | 0.66 |
|          |       | CF-Perm       | 1.25                      | 0.94 | 0.75 | 0.63 | 0.54 | 0.94                      | 0.71 | 0.58 | 0.49 | 0.42 |
| 0.5      | 0.01  | Randomization | 2.35                      | 1.58 | 1.30 | 1.13 | 1.01 | 2.05                      | 1.44 | 1.22 | 1.07 | 0.97 |
|          |       | GLMM-C        | 1.33                      | 0.99 | 0.80 | 0.67 | 0.58 | 0.98                      | 0.73 | 0.58 | 0.49 | 0.42 |
|          |       | GLMM-CP       | 1.36                      | 1.01 | 0.81 | 0.68 | 0.58 | 1.00                      | 0.74 | 0.59 | 0.49 | 0.43 |
|          |       | GEE           | 0.95                      | 0.78 | 0.66 | 0.57 | 0.50 | 0.71                      | 0.56 | 0.48 | 0.41 | 0.36 |
|          |       | GEE-FGd5      | 1.64                      | 1.09 | 0.84 | 0.69 | 0.59 | 1.25                      | 0.81 | 0.62 | 0.51 | 0.43 |
|          |       | NPWP          | 3.76                      | 1.81 | 1.49 | 1.29 | 1.15 | 3.11                      | 1.61 | 1.37 | 1.19 | 1.07 |
|          |       | Crossover     | 2.08                      | 1.38 | 1.14 | 1.01 | 0.90 | 1.52                      | 1.01 | 0.84 | 0.74 | 0.67 |
|          |       | CF-Perm       | 1.95                      | 1.59 | 1.37 | 1.22 | 1.10 | 1.70                      | 1.41 | 1.25 | 1.11 | 1.02 |
| 0.5      | 0.1   | Randomization | 2.38                      | 1.59 | 1.31 | 1.14 | 1.02 | 2.06                      | 1.45 | 1.23 | 1.07 | 0.97 |
|          |       | GLMM-C        | 1.33                      | 0.99 | 0.80 | 0.67 | 0.58 | 0.98                      | 0.73 | 0.58 | 0.49 | 0.42 |
|          |       | GLMM-CP       | 1.37                      | 1.01 | 0.81 | 0.68 | 0.59 | 1.02                      | 0.75 | 0.60 | 0.50 | 0.43 |
|          |       | GEE           | 0.98                      | 0.80 | 0.67 | 0.58 | 0.51 | 0.73                      | 0.59 | 0.50 | 0.43 | 0.38 |
|          |       | GEE-FGd5      | 1.69                      | 1.12 | 0.86 | 0.71 | 0.60 | 1.30                      | 0.85 | 0.65 | 0.53 | 0.45 |
|          |       | NPWP          | 3.77                      | 1.83 | 1.50 | 1.30 | 1.15 | 3.10                      | 1.62 | 1.38 | 1.19 | 1.08 |
|          |       | Crossover     | 2.12                      | 1.42 | 1.17 | 1.03 | 0.93 | 1.57                      | 1.05 | 0.88 | 0.77 | 0.69 |
|          |       | CF-Perm       | 1.97                      | 1.60 | 1.38 | 1.23 | 1.11 | 1.72                      | 1.42 | 1.26 | 1.12 | 1.03 |

**Table S8.** [Nonstratified randomization,  $(\sigma, \nu) = (0.1, 0.1)$ ] **Type I error (%)** across 2,000 data sets simulated via **model (6) (random cluster-intervention effects)** as described in Section 3.1.1 with  $\theta^* = 0$ . We considered different cluster-period size ranges ( $m_{ij}$ ) and numbers of clusters ( $N$ ). Methods considered included our proposed individual-level randomization-based approach (Randomization), a logistic mixed model with random cluster effects (GLMM-C), a logistic mixed model with random cluster and cluster-period effects (GLMM-CP), a logistic mixed model with random cluster and cluster-period and cluster-intervention effects (GLMM-CPI), a marginal model fit via a generalized estimating equation (GEE), a small-sample adjusted GEE (GEE-FGd5), a cluster-level nonparametric within-period approach (NPWP), a cluster-level crossover method (Crossover), and a closed-form permutation-based estimator (CF-Perm).

| $\lambda$ | Method        | $m_{ij} \sim U\{20, 30\}$ |    |    |    |    | $m_{ij} \sim U\{20, 80\}$ |    |    |    |    |
|-----------|---------------|---------------------------|----|----|----|----|---------------------------|----|----|----|----|
|           |               | N                         |    |    |    |    |                           |    |    |    |    |
|           |               | 6                         | 8  | 10 | 12 | 14 | 6                         | 8  | 10 | 12 | 14 |
| 0.1       | Randomization | 5                         | 5  | 5  | 5  | 5  | 4                         | 6  | 6  | 5  | 6  |
|           | GLMM-C        | 6                         | 5  | 6  | 6  | 6  | 6                         | 9  | 9  | 7  | 8  |
|           | GLMM-CP       | 6                         | 5  | 6  | 6  | 6  | 6                         | 8  | 9  | 6  | 8  |
|           | GLMM-CPI      | 5                         | 5  | 5  | 6  | 6  | 6                         | 8  | 8  | 6  | 7  |
|           | GEE           | 23                        | 18 | 14 | 13 | 10 | 26                        | 20 | 17 | 12 | 12 |
|           | GEE-FGd5      | 3                         | 4  | 5  | 6  | 6  | 4                         | 5  | 6  | 6  | 7  |
|           | NPWP          | 5                         | 5  | 6  | 5  | 5  | 5                         | 6  | 5  | 5  | 6  |
|           | Crossover     | 5                         | 4  | 5  | 5  | 5  | 4                         | 6  | 6  | 5  | 6  |
|           | CF-Perm       | 8                         | 7  | 6  | 6  | 6  | 9                         | 7  | 6  | 6  | 8  |
| 0.5       | Randomization | 5                         | 8  | 8  | 9  | 9  | 7                         | 8  | 9  | 10 | 10 |
|           | GLMM-C        | 11                        | 13 | 15 | 16 | 16 | 17                        | 20 | 24 | 23 | 26 |
|           | GLMM-CP       | 9                         | 11 | 12 | 13 | 14 | 13                        | 15 | 17 | 16 | 18 |
|           | GLMM-CPI      | 7                         | 8  | 8  | 6  | 7  | 10                        | 9  | 9  | 8  | 9  |
|           | GEE           | 22                        | 17 | 15 | 13 | 11 | 24                        | 19 | 16 | 14 | 13 |
|           | GEE-FGd5      | 4                         | 6  | 7  | 7  | 7  | 6                         | 7  | 8  | 7  | 8  |
|           | NPWP          | 5                         | 7  | 8  | 10 | 9  | 7                         | 9  | 10 | 12 | 13 |
|           | Crossover     | 6                         | 6  | 8  | 8  | 9  | 6                         | 9  | 10 | 10 | 12 |
|           | CF-Perm       | 10                        | 10 | 9  | 10 | 9  | 12                        | 12 | 10 | 11 | 12 |
| 1         | Randomization | 8                         | 10 | 10 | 11 | 13 | 9                         | 12 | 14 | 12 | 11 |
|           | GLMM-C        | 21                        | 26 | 30 | 34 | 40 | 33                        | 40 | 42 | 47 | 51 |
|           | GLMM-CP       | 13                        | 16 | 17 | 21 | 24 | 15                        | 19 | 21 | 23 | 26 |
|           | GLMM-CPI      | 9                         | 9  | 8  | 7  | 8  | 9                         | 9  | 8  | 8  | 8  |
|           | GEE           | 22                        | 19 | 15 | 14 | 15 | 25                        | 20 | 16 | 16 | 16 |
|           | GEE-FGd5      | 6                         | 8  | 7  | 7  | 9  | 7                         | 8  | 8  | 10 | 10 |
|           | NPWP          | 8                         | 13 | 15 | 17 | 18 | 9                         | 18 | 20 | 21 | 22 |
|           | Crossover     | 7                         | 11 | 13 | 14 | 16 | 10                        | 14 | 17 | 20 | 22 |
|           | CF-Perm       | 13                        | 13 | 12 | 11 | 12 | 15                        | 14 | 14 | 12 | 12 |



**Table S9.** [Nonstratified randomization,  $(\sigma, \nu) = (0.1, 0.1)$ ] **CI coverage (%)** across 2,000 data sets simulated via **model (6) (random cluster-intervention effects)** as described in Section 3.1.1 with  $\theta^* = 0$ . We considered different cluster-period size ranges ( $m_{ij}$ ) and numbers of clusters ( $N$ ). Methods considered included our proposed individual-level randomization-based approach (Randomization), a logistic mixed model with random cluster effects (GLMM-C), a logistic mixed model with random cluster and cluster-period effects (GLMM-CP), a logistic mixed model with random cluster and cluster-period and cluster-intervention effects (GLMM-CPI), a marginal model fit via a generalized estimating equation (GEE), a small-sample adjusted GEE (GEE-FGd5), a cluster-level nonparametric within-period approach (NPWP), a cluster-level crossover method (Crossover), and a closed-form permutation-based estimator (CF-Perm).

| $\lambda$ | Method        | $m_{ij} \sim U\{20, 30\}$ |    |    |    |    | $m_{ij} \sim U\{20, 80\}$ |    |    |    |    |
|-----------|---------------|---------------------------|----|----|----|----|---------------------------|----|----|----|----|
|           |               | N                         |    |    |    |    | N                         |    |    |    |    |
|           |               | 6                         | 8  | 10 | 12 | 14 | 6                         | 8  | 10 | 12 | 14 |
| 0.1       | Randomization | 95                        | 95 | 95 | 95 | 95 | 95                        | 94 | 94 | 95 | 94 |
|           | GLMM-C        | 94                        | 95 | 94 | 94 | 94 | 94                        | 91 | 91 | 93 | 92 |
|           | GLMM-CP       | 94                        | 95 | 94 | 94 | 94 | 94                        | 92 | 91 | 94 | 92 |
|           | GLMM-CPI      | 95                        | 95 | 95 | 94 | 94 | 94                        | 92 | 92 | 94 | 93 |
|           | GEE           | 77                        | 82 | 86 | 87 | 90 | 74                        | 80 | 83 | 88 | 88 |
|           | GEE-FGd5      | 97                        | 96 | 95 | 94 | 94 | 96                        | 95 | 94 | 94 | 93 |
|           | NPWP          | 96                        | 95 | 94 | 95 | 95 | 96                        | 95 | 95 | 95 | 94 |
|           | Crossover     | 96                        | 96 | 95 | 95 | 95 | 97                        | 94 | 94 | 95 | 94 |
|           | CF-Perm       | 92                        | 93 | 94 | 94 | 94 | 91                        | 93 | 94 | 94 | 92 |
| 0.5       | Randomization | 94                        | 92 | 92 | 91 | 92 | 93                        | 91 | 91 | 91 | 90 |
|           | GLMM-C        | 89                        | 87 | 85 | 84 | 84 | 83                        | 80 | 76 | 77 | 74 |
|           | GLMM-CP       | 91                        | 89 | 88 | 87 | 86 | 87                        | 85 | 83 | 84 | 82 |
|           | GLMM-CPI      | 93                        | 92 | 92 | 94 | 93 | 90                        | 91 | 91 | 92 | 91 |
|           | GEE           | 78                        | 83 | 85 | 87 | 89 | 76                        | 81 | 84 | 86 | 87 |
|           | GEE-FGd5      | 96                        | 94 | 93 | 93 | 93 | 94                        | 93 | 92 | 93 | 92 |
|           | NPWP          | 95                        | 93 | 92 | 90 | 91 | 94                        | 91 | 90 | 89 | 88 |
|           | Crossover     | 96                        | 94 | 92 | 92 | 92 | 95                        | 91 | 91 | 90 | 89 |
|           | CF-Perm       | 90                        | 90 | 91 | 90 | 91 | 88                        | 88 | 90 | 89 | 88 |
| 1         | Randomization | 91                        | 90 | 90 | 89 | 87 | 90                        | 88 | 86 | 88 | 88 |
|           | GLMM-C        | 79                        | 74 | 70 | 66 | 60 | 67                        | 60 | 58 | 53 | 49 |
|           | GLMM-CP       | 87                        | 84 | 83 | 79 | 76 | 85                        | 81 | 79 | 77 | 74 |
|           | GLMM-CPI      | 91                        | 91 | 92 | 93 | 92 | 91                        | 91 | 92 | 92 | 92 |
|           | GEE           | 78                        | 81 | 85 | 86 | 85 | 75                        | 80 | 84 | 84 | 84 |
|           | GEE-FGd5      | 94                        | 92 | 93 | 93 | 91 | 93                        | 92 | 92 | 90 | 90 |
|           | NPWP          | 93                        | 88 | 87 | 85 | 83 | 92                        | 85 | 82 | 81 | 79 |
|           | Crossover     | 94                        | 90 | 88 | 87 | 84 | 92                        | 88 | 85 | 82 | 80 |
|           | CF-Perm       | 87                        | 87 | 88 | 89 | 88 | 85                        | 86 | 86 | 88 | 88 |

**Table S10.** [Nonstratified randomization,  $(\sigma, \nu) = (0.1, 0.1)$ ] **Average CI width** across 2,000 data sets simulated via **model (6) (random cluster-intervention effects)** as described in Section 3.1.1 with  $\theta^* = 0$ . We considered different cluster-period size ranges ( $m_{ij}$ ) and numbers of clusters ( $N$ ). Methods considered included our proposed individual-level randomization-based approach (Randomization), a logistic mixed model with random cluster effects (GLMM-C), a logistic mixed model with random cluster and cluster-period effects (GLMM-CP), a logistic mixed model with random cluster and cluster-period and cluster-intervention effects (GLMM-CPI), a marginal model fit via a generalized estimating equation (GEE), a small-sample adjusted GEE (GEE-FGd5), a cluster-level nonparametric within-period approach (NPWP), a cluster-level crossover method (Crossover), and a closed-form permutation-based estimator (CF-Perm).

| $\lambda$ | Method        | $m_{ij} \sim U\{20, 30\}$ |      |      |      |      | $m_{ij} \sim U\{20, 80\}$ |      |      |      |      |
|-----------|---------------|---------------------------|------|------|------|------|---------------------------|------|------|------|------|
|           |               | N                         |      |      |      |      | N                         |      |      |      |      |
|           |               | 6                         | 8    | 10   | 12   | 14   | 6                         | 8    | 10   | 12   | 14   |
| 0.1       | Randomization | 1.50                      | 0.95 | 0.74 | 0.61 | 0.52 | 1.13                      | 0.74 | 0.57 | 0.47 | 0.41 |
|           | GLMM-C        | 1.15                      | 0.84 | 0.67 | 0.56 | 0.48 | 0.83                      | 0.61 | 0.49 | 0.41 | 0.35 |
|           | GLMM-CP       | 1.17                      | 0.85 | 0.68 | 0.56 | 0.48 | 0.85                      | 0.63 | 0.50 | 0.42 | 0.36 |
|           | GLMM-CPI      | 1.19                      | 0.87 | 0.69 | 0.57 | 0.49 | 0.87                      | 0.64 | 0.52 | 0.43 | 0.38 |
|           | GEE           | 0.85                      | 0.68 | 0.58 | 0.50 | 0.44 | 0.65                      | 0.51 | 0.44 | 0.38 | 0.34 |
|           | GEE-FGd5      | 2.01                      | 1.14 | 0.80 | 0.64 | 0.54 | 3.58                      | 0.91 | 0.61 | 0.48 | 0.41 |
|           | NPWP          | 2.55                      | 1.11 | 0.86 | 0.70 | 0.60 | 1.98                      | 0.85 | 0.66 | 0.54 | 0.46 |
|           | Crossover     | 2.05                      | 1.37 | 1.14 | 0.99 | 0.90 | 1.53                      | 1.02 | 0.85 | 0.74 | 0.66 |
|           | CF-Perm       | 1.26                      | 0.95 | 0.77 | 0.65 | 0.56 | 0.96                      | 0.74 | 0.60 | 0.50 | 0.44 |
| 0.5       | Randomization | 1.92                      | 1.24 | 1.00 | 0.86 | 0.76 | 1.57                      | 1.09 | 0.90 | 0.78 | 0.69 |
|           | GLMM-C        | 1.23                      | 0.91 | 0.74 | 0.62 | 0.54 | 0.92                      | 0.69 | 0.55 | 0.46 | 0.40 |
|           | GLMM-CP       | 1.33                      | 0.98 | 0.80 | 0.67 | 0.58 | 1.06                      | 0.80 | 0.65 | 0.55 | 0.48 |
|           | GLMM-CPI      | 1.42                      | 1.09 | 0.92 | 0.81 | 0.72 | 1.14                      | 0.92 | 0.79 | 0.70 | 0.63 |
|           | GEE           | 1.06                      | 0.88 | 0.79 | 0.71 | 0.65 | 0.85                      | 0.75 | 0.68 | 0.62 | 0.57 |
|           | GEE-FGd5      | 2.02                      | 1.29 | 1.03 | 0.88 | 0.77 | 1.67                      | 1.09 | 0.88 | 0.76 | 0.68 |
|           | NPWP          | 3.20                      | 1.42 | 1.14 | 0.97 | 0.84 | 2.71                      | 1.20 | 0.98 | 0.83 | 0.73 |
|           | Crossover     | 2.25                      | 1.47 | 1.21 | 1.06 | 0.94 | 1.75                      | 1.14 | 0.93 | 0.81 | 0.71 |
|           | CF-Perm       | 1.62                      | 1.25 | 1.06 | 0.93 | 0.82 | 1.32                      | 1.08 | 0.92 | 0.81 | 0.73 |
| 1         | Randomization | 2.76                      | 1.81 | 1.49 | 1.32 | 1.17 | 2.52                      | 1.73 | 1.43 | 1.27 | 1.13 |
|           | GLMM-C        | 1.33                      | 0.99 | 0.80 | 0.67 | 0.58 | 0.98                      | 0.73 | 0.58 | 0.49 | 0.42 |
|           | GLMM-CP       | 1.71                      | 1.28 | 1.04 | 0.87 | 0.75 | 1.54                      | 1.15 | 0.93 | 0.79 | 0.67 |
|           | GLMM-CPI      | 1.94                      | 1.59 | 1.40 | 1.26 | 1.13 | 1.72                      | 1.45 | 1.29 | 1.17 | 1.07 |
|           | GEE           | 1.38                      | 1.21 | 1.11 | 1.03 | 0.95 | 1.23                      | 1.11 | 1.03 | 0.97 | 0.90 |
|           | GEE-FGd5      | 2.34                      | 1.69 | 1.42 | 1.25 | 1.12 | 2.14                      | 1.58 | 1.34 | 1.20 | 1.07 |
|           | NPWP          | 3.62                      | 2.01 | 1.66 | 1.43 | 1.27 | 3.60                      | 1.82 | 1.50 | 1.32 | 1.17 |
|           | Crossover     | 2.68                      | 1.72 | 1.39 | 1.19 | 1.05 | 2.24                      | 1.45 | 1.15 | 0.98 | 0.86 |
|           | CF-Perm       | 2.31                      | 1.86 | 1.62 | 1.46 | 1.32 | 2.09                      | 1.75 | 1.53 | 1.39 | 1.26 |

**Table S11.** [Stratified randomization,  $m_{ij} \sim U\{20, 30\}$ ] **Type I error (%)** across 2,000 data sets simulated via model (7) as described in Section 3.2.1 with  $\theta^* = 0$ . Methods considered included our proposed individual-level randomization-based approach (Randomization), a logistic mixed model with random cluster effects (GLMM-C), a logistic mixed model with random cluster and cluster-period effects (GLMM-CP), a marginal model fit via a generalized estimating equation (GEE), and a small-sample adjusted GEE (GEE-FGd5). For each method, rows correspond to increasing  $Y$ - $Z$  association, controlled by increasing data generation parameter  $\gamma^*$ . Both nonstratified and stratified analyses were carried out.

| Method        | $\gamma^*$ | Nonstratified analysis |    |    |    |    | Stratified analysis |    |    |    |    |
|---------------|------------|------------------------|----|----|----|----|---------------------|----|----|----|----|
|               |            | N                      |    |    |    |    | N                   |    |    |    |    |
|               |            | 6                      | 8  | 10 | 12 | 14 | 6                   | 8  | 10 | 12 | 14 |
| Randomization | 0          | 5                      | 5  | 6  | 5  | 4  | 3                   | 4  | 5  | 5  | 4  |
|               | 0.2        | 4                      | 4  | 4  | 4  | 4  | 3                   | 5  | 5  | 5  | 5  |
|               | 0.7        | 1                      | 0  | 0  | 0  | 0  | 3                   | 5  | 5  | 6  | 5  |
|               | 1.5        | 0                      | 0  | 0  | 0  | 0  | 3                   | 5  | 5  | 5  | 4  |
| GLMM-C        | 0          | 6                      | 6  | 7  | 5  | 5  | 6                   | 6  | 7  | 5  | 5  |
|               | 0.2        | 5                      | 5  | 5  | 6  | 5  | 5                   | 6  | 6  | 6  | 6  |
|               | 0.7        | 4                      | 3  | 4  | 4  | 4  | 6                   | 5  | 6  | 6  | 6  |
|               | 1.5        | 4                      | 4  | 5  | 4  | 5  | 5                   | 6  | 5  | 6  | 6  |
| GLMM-CP       | 0          | 6                      | 5  | 6  | 5  | 5  | 6                   | 6  | 6  | 5  | 5  |
|               | 0.2        | 4                      | 5  | 5  | 6  | 5  | 5                   | 6  | 5  | 7  | 6  |
|               | 0.7        | 4                      | 3  | 3  | 4  | 4  | 5                   | 5  | 5  | 6  | 6  |
|               | 1.5        | 3                      | 4  | 5  | 4  | 4  | 5                   | 6  | 5  | 6  | 5  |
| GEE           | 0          | 25                     | 18 | 15 | 11 | 11 | 30                  | 21 | 17 | 13 | 12 |
|               | 0.2        | 21                     | 16 | 14 | 11 | 9  | 28                  | 21 | 17 | 15 | 13 |
|               | 0.7        | 15                     | 12 | 10 | 8  | 8  | 29                  | 20 | 16 | 15 | 12 |
|               | 1.5        | 16                     | 13 | 10 | 10 | 8  | 27                  | 21 | 17 | 14 | 11 |
| GEE-FGd5      | 0          | 3                      | 4  | 5  | 5  | 5  | 2                   | 4  | 6  | 5  | 5  |
|               | 0.2        | 3                      | 4  | 5  | 6  | 4  | 2                   | 4  | 5  | 6  | 6  |
|               | 0.7        | 3                      | 4  | 5  | 4  | 4  | 2                   | 4  | 5  | 6  | 6  |
|               | 1.5        | 4                      | 4  | 5  | 5  | 4  | 2                   | 4  | 5  | 5  | 5  |

**Table S12.** [Stratified randomization,  $m_{ij} \sim U\{20, 30\}$ ] **CI coverage (%)** across 2,000 data sets simulated via model (7) as described in Section 3.2.1 with  $\theta^* = 0$ . Methods considered included our proposed individual-level randomization-based approach (Randomization), a logistic mixed model with random cluster effects (GLMM-C), a logistic mixed model with random cluster and cluster-period effects (GLMM-CP), a marginal model fit via a generalized estimating equation (GEE), and a small-sample adjusted GEE (GEE-FGd5). For each method, rows correspond to increasing  $Y$ - $Z$  association, controlled by increasing data generation parameter  $\gamma^*$ . Both nonstratified and stratified analyses were carried out.

| Method        | $\gamma^*$ | Nonstratified analysis |     |     |     |     | Stratified analysis |    |    |    |    |
|---------------|------------|------------------------|-----|-----|-----|-----|---------------------|----|----|----|----|
|               |            | N                      |     |     |     |     |                     |    |    |    |    |
|               |            | 6                      | 8   | 10  | 12  | 14  | 6                   | 8  | 10 | 12 | 14 |
| Randomization | 0          | 94                     | 95  | 95  | 95  | 95  | 94                  | 95 | 95 | 95 | 96 |
|               | 0.2        | 96                     | 96  | 96  | 96  | 96  | 96                  | 95 | 95 | 95 | 95 |
|               | 0.7        | 99                     | 100 | 100 | 100 | 100 | 95                  | 95 | 95 | 95 | 94 |
|               | 1.5        | 100                    | 100 | 100 | 100 | 100 | 95                  | 95 | 95 | 95 | 96 |
| GLMM-C        | 0          | 94                     | 94  | 93  | 95  | 95  | 94                  | 94 | 93 | 95 | 95 |
|               | 0.2        | 95                     | 95  | 95  | 94  | 95  | 95                  | 94 | 94 | 94 | 94 |
|               | 0.7        | 96                     | 97  | 96  | 96  | 96  | 94                  | 95 | 94 | 94 | 94 |
|               | 1.5        | 96                     | 96  | 95  | 96  | 95  | 95                  | 94 | 95 | 94 | 94 |
| GLMM-CP       | 0          | 94                     | 95  | 94  | 95  | 95  | 94                  | 94 | 94 | 95 | 95 |
|               | 0.2        | 96                     | 95  | 95  | 94  | 95  | 95                  | 94 | 95 | 93 | 94 |
|               | 0.7        | 96                     | 97  | 97  | 96  | 96  | 95                  | 95 | 95 | 94 | 94 |
|               | 1.5        | 97                     | 96  | 95  | 96  | 96  | 95                  | 94 | 95 | 94 | 95 |
| GEE           | 0          | 75                     | 82  | 85  | 89  | 89  | 70                  | 79 | 83 | 87 | 88 |
|               | 0.2        | 79                     | 84  | 86  | 89  | 91  | 72                  | 79 | 83 | 85 | 87 |
|               | 0.7        | 85                     | 88  | 90  | 92  | 92  | 71                  | 80 | 84 | 85 | 88 |
|               | 1.5        | 84                     | 87  | 90  | 90  | 92  | 73                  | 79 | 83 | 86 | 89 |
| GEE-FGd5      | 0          | 97                     | 96  | 95  | 95  | 95  | 98                  | 96 | 94 | 95 | 95 |
|               | 0.2        | 97                     | 96  | 95  | 94  | 96  | 98                  | 96 | 95 | 94 | 94 |
|               | 0.7        | 97                     | 96  | 95  | 96  | 96  | 98                  | 96 | 95 | 94 | 94 |
|               | 1.5        | 96                     | 96  | 95  | 95  | 96  | 98                  | 96 | 95 | 95 | 95 |

**Table S13.** [Stratified randomization,  $m_{ij} \sim U\{20, 30\}$ ] **Average CI width** across 2,000 data sets simulated via model (7) as described in Section 3.2.1 with  $\theta^* = 0$ . Methods considered included our proposed individual-level randomization-based approach (Randomization), a logistic mixed model with random cluster effects (GLMM-C), a logistic mixed model with random cluster and cluster-period effects (GLMM-CP), a marginal model fit via a generalized estimating equation (GEE), and a small-sample adjusted GEE (GEE-FGd5). For each method, rows correspond to increasing  $Y$ - $Z$  association, controlled by increasing data generation parameter  $\gamma^*$ . Both nonstratified and stratified analyses were carried out.

| Method        | $\gamma^*$ | Nonstratified analysis |      |      |      |      | Stratified analysis |      |      |      |      |
|---------------|------------|------------------------|------|------|------|------|---------------------|------|------|------|------|
|               |            | N                      |      |      |      |      | N                   |      |      |      |      |
|               |            | 6                      | 8    | 10   | 12   | 14   | 6                   | 8    | 10   | 12   | 14   |
| Randomization | 0          | 1.42                   | 0.93 | 0.71 | 0.58 | 0.50 | 1.67                | 0.96 | 0.72 | 0.58 | 0.50 |
|               | 0.2        | 1.48                   | 0.95 | 0.74 | 0.61 | 0.53 | 1.69                | 0.93 | 0.71 | 0.58 | 0.49 |
|               | 0.7        | 2.08                   | 1.39 | 1.12 | 0.95 | 0.84 | 1.58                | 0.88 | 0.67 | 0.54 | 0.46 |
|               | 1.5        | 4.73                   | 2.69 | 2.10 | 1.79 | 1.58 | 1.46                | 0.81 | 0.61 | 0.51 | 0.43 |
| GLMM-C        | 0          | 1.14                   | 0.84 | 0.66 | 0.55 | 0.47 | 1.12                | 0.83 | 0.65 | 0.54 | 0.47 |
|               | 0.2        | 1.14                   | 0.83 | 0.66 | 0.56 | 0.48 | 1.11                | 0.81 | 0.64 | 0.53 | 0.46 |
|               | 0.7        | 1.21                   | 0.90 | 0.73 | 0.61 | 0.53 | 1.06                | 0.78 | 0.62 | 0.52 | 0.44 |
|               | 1.5        | 1.29                   | 0.96 | 0.77 | 0.65 | 0.56 | 1.08                | 0.79 | 0.63 | 0.52 | 0.45 |
| GLMM-CP       | 0          | 1.15                   | 0.85 | 0.67 | 0.55 | 0.47 | 1.13                | 0.83 | 0.66 | 0.55 | 0.47 |
|               | 0.2        | 1.15                   | 0.84 | 0.67 | 0.56 | 0.48 | 1.11                | 0.81 | 0.65 | 0.54 | 0.46 |
|               | 0.7        | 1.24                   | 0.92 | 0.74 | 0.62 | 0.53 | 1.07                | 0.79 | 0.62 | 0.52 | 0.45 |
|               | 1.5        | 1.32                   | 0.98 | 0.78 | 0.65 | 0.56 | 1.09                | 0.80 | 0.63 | 0.53 | 0.45 |
| GEE           | 0          | 0.80                   | 0.65 | 0.55 | 0.48 | 0.42 | 0.73                | 0.62 | 0.53 | 0.46 | 0.41 |
|               | 0.2        | 0.83                   | 0.66 | 0.57 | 0.49 | 0.44 | 0.73                | 0.60 | 0.52 | 0.46 | 0.40 |
|               | 0.7        | 0.93                   | 0.74 | 0.62 | 0.54 | 0.47 | 0.72                | 0.59 | 0.51 | 0.44 | 0.39 |
|               | 1.5        | 0.89                   | 0.71 | 0.59 | 0.50 | 0.45 | 0.73                | 0.60 | 0.51 | 0.45 | 0.40 |
| GEE-FGd5      | 0          | 1.97                   | 1.05 | 0.77 | 0.61 | 0.52 | 2.11                | 1.09 | 0.77 | 0.61 | 0.51 |
|               | 0.2        | 1.80                   | 1.05 | 0.77 | 0.62 | 0.53 | 2.02                | 1.06 | 0.75 | 0.60 | 0.50 |
|               | 0.7        | 1.57                   | 1.04 | 0.79 | 0.65 | 0.55 | 2.20                | 1.05 | 0.73 | 0.58 | 0.48 |
|               | 1.5        | 1.49                   | 1.00 | 0.76 | 0.61 | 0.52 | 2.13                | 1.08 | 0.74 | 0.58 | 0.49 |

**Table S14.** [Stratified randomization,  $m_{ij} \sim U\{20, 80\}$ ] **Type I error** (%) across 2,000 data sets simulated via model (7) as described in Section 3.2.1 with  $\theta^* = 0$ . Methods considered included our proposed individual-level randomization-based approach (Randomization), a logistic mixed model with random cluster effects (GLMM-C), a logistic mixed model with random cluster and cluster-period effects (GLMM-CP), a marginal model fit via a generalized estimating equation (GEE), and a small-sample adjusted GEE (GEE-FGd5). For each method, rows correspond to increasing  $Y$ - $Z$  association, controlled by increasing data generation parameter  $\gamma^*$ . Both nonstratified and stratified analyses were carried out.

| Method        | $\gamma^*$ | Nonstratified analysis |    |    |    |    | Stratified analysis |    |    |    |    |
|---------------|------------|------------------------|----|----|----|----|---------------------|----|----|----|----|
|               |            | N                      |    |    |    |    | N                   |    |    |    |    |
|               |            | 6                      | 8  | 10 | 12 | 14 | 6                   | 8  | 10 | 12 | 14 |
| Randomization | 0          | 4                      | 5  | 5  | 5  | 5  | 3                   | 5  | 5  | 5  | 5  |
|               | 0.2        | 3                      | 4  | 4  | 3  | 3  | 3                   | 5  | 5  | 4  | 5  |
|               | 0.7        | 0                      | 0  | 0  | 0  | 0  | 3                   | 4  | 5  | 5  | 5  |
|               | 1.5        | 0                      | 0  | 0  | 0  | 0  | 2                   | 5  | 5  | 5  | 5  |
| GLMM-C        | 0          | 6                      | 6  | 6  | 6  | 6  | 6                   | 6  | 6  | 6  | 6  |
|               | 0.2        | 5                      | 5  | 5  | 4  | 5  | 6                   | 7  | 7  | 5  | 7  |
|               | 0.7        | 4                      | 4  | 5  | 5  | 4  | 6                   | 6  | 6  | 5  | 5  |
|               | 1.5        | 4                      | 5  | 5  | 5  | 5  | 5                   | 7  | 6  | 7  | 7  |
| GLMM-CP       | 0          | 5                      | 6  | 6  | 5  | 6  | 6                   | 6  | 6  | 6  | 6  |
|               | 0.2        | 5                      | 5  | 5  | 4  | 5  | 5                   | 6  | 6  | 5  | 7  |
|               | 0.7        | 4                      | 3  | 5  | 5  | 4  | 6                   | 6  | 6  | 5  | 5  |
|               | 1.5        | 4                      | 5  | 5  | 4  | 5  | 5                   | 7  | 6  | 7  | 7  |
| GEE           | 0          | 24                     | 19 | 16 | 12 | 12 | 28                  | 21 | 18 | 14 | 13 |
|               | 0.2        | 22                     | 15 | 13 | 9  | 8  | 28                  | 22 | 18 | 12 | 12 |
|               | 0.7        | 17                     | 12 | 11 | 9  | 8  | 29                  | 21 | 17 | 13 | 12 |
|               | 1.5        | 18                     | 14 | 12 | 10 | 10 | 30                  | 21 | 17 | 15 | 14 |
| GEE-FGd5      | 0          | 3                      | 4  | 5  | 6  | 6  | 2                   | 4  | 5  | 6  | 6  |
|               | 0.2        | 3                      | 4  | 5  | 4  | 4  | 2                   | 5  | 6  | 5  | 6  |
|               | 0.7        | 3                      | 4  | 4  | 5  | 4  | 2                   | 4  | 5  | 6  | 6  |
|               | 1.5        | 3                      | 4  | 5  | 5  | 5  | 2                   | 4  | 6  | 6  | 6  |

**Table S15.** [Stratified randomization,  $m_{ij} \sim U\{20, 80\}$ ] **CI coverage (%)** across 2,000 data sets simulated via model (7) as described in Section 3.2.1 with  $\theta^* = 0$ . Methods considered included our proposed individual-level randomization-based approach (Randomization), a logistic mixed model with random cluster effects (GLMM-C), a logistic mixed model with random cluster and cluster-period effects (GLMM-CP), a marginal model fit via a generalized estimating equation (GEE), and a small-sample adjusted GEE (GEE-FGd5). For each method, rows correspond to increasing  $Y$ - $Z$  association, controlled by increasing data generation parameter  $\gamma^*$ . Both nonstratified and stratified analyses were carried out.

| Method        | $\gamma^*$ | Nonstratified analysis |     |     |     |     | Stratified analysis |    |    |    |    |
|---------------|------------|------------------------|-----|-----|-----|-----|---------------------|----|----|----|----|
|               |            | N                      |     |     |     |     | N                   |    |    |    |    |
|               |            | 6                      | 8   | 10  | 12  | 14  | 6                   | 8  | 10 | 12 | 14 |
| Randomization | 0          | 96                     | 94  | 95  | 95  | 95  | 95                  | 95 | 95 | 95 | 95 |
|               | 0.2        | 97                     | 96  | 97  | 97  | 97  | 96                  | 94 | 94 | 96 | 95 |
|               | 0.7        | 100                    | 100 | 100 | 100 | 100 | 95                  | 96 | 95 | 95 | 95 |
|               | 1.5        | 100                    | 100 | 100 | 100 | 100 | 95                  | 95 | 95 | 95 | 94 |
| GLMM-C        | 0          | 94                     | 94  | 94  | 94  | 94  | 94                  | 94 | 94 | 94 | 94 |
|               | 0.2        | 95                     | 95  | 95  | 96  | 95  | 94                  | 93 | 93 | 95 | 93 |
|               | 0.7        | 96                     | 96  | 95  | 95  | 96  | 94                  | 94 | 94 | 95 | 95 |
|               | 1.5        | 96                     | 95  | 95  | 95  | 95  | 95                  | 93 | 94 | 93 | 93 |
| GLMM-CP       | 0          | 95                     | 94  | 94  | 95  | 94  | 94                  | 94 | 94 | 94 | 94 |
|               | 0.2        | 95                     | 95  | 95  | 96  | 95  | 95                  | 94 | 94 | 95 | 93 |
|               | 0.7        | 96                     | 97  | 95  | 95  | 96  | 94                  | 94 | 94 | 95 | 95 |
|               | 1.5        | 96                     | 95  | 95  | 96  | 95  | 95                  | 93 | 94 | 93 | 93 |
| GEE           | 0          | 76                     | 81  | 84  | 88  | 88  | 72                  | 79 | 82 | 86 | 87 |
|               | 0.2        | 78                     | 85  | 87  | 91  | 92  | 72                  | 78 | 82 | 88 | 88 |
|               | 0.7        | 83                     | 88  | 89  | 91  | 92  | 71                  | 79 | 83 | 87 | 88 |
|               | 1.5        | 82                     | 86  | 88  | 90  | 90  | 70                  | 79 | 83 | 85 | 86 |
| GEE-FGd5      | 0          | 97                     | 96  | 95  | 94  | 94  | 98                  | 96 | 95 | 94 | 94 |
|               | 0.2        | 97                     | 96  | 95  | 96  | 96  | 98                  | 95 | 94 | 95 | 94 |
|               | 0.7        | 97                     | 96  | 96  | 95  | 96  | 98                  | 96 | 95 | 94 | 94 |
|               | 1.5        | 97                     | 96  | 95  | 95  | 95  | 98                  | 96 | 94 | 94 | 94 |

**Table S16.** [Stratified randomization,  $m_{ij} \sim U\{20, 80\}$ ] **Average CI width** across 2,000 data sets simulated via model (7) as described in Section 3.2.1 with  $\theta^* = 0$ . Methods considered included our proposed individual-level randomization-based approach (Randomization), a logistic mixed model with random cluster effects (GLMM-C), a logistic mixed model with random cluster and cluster-period effects (GLMM-CP), a marginal model fit via a generalized estimating equation (GEE), and a small-sample adjusted GEE (GEE-FGd5). For each method, rows correspond to increasing  $Y$ - $Z$  association, controlled by increasing data generation parameter  $\gamma^*$ . Both nonstratified and stratified analyses were carried out.

| Method        | $\gamma^*$ | Nonstratified analysis |      |      |      |      | Stratified analysis |      |      |      |      |
|---------------|------------|------------------------|------|------|------|------|---------------------|------|------|------|------|
|               |            | N                      |      |      |      |      | N                   |      |      |      |      |
|               |            | 6                      | 8    | 10   | 12   | 14   | 6                   | 8    | 10   | 12   | 14   |
| Randomization | 0          | 1.06                   | 0.68 | 0.53 | 0.44 | 0.38 | 1.24                | 0.70 | 0.54 | 0.44 | 0.38 |
|               | 0.2        | 1.10                   | 0.74 | 0.58 | 0.49 | 0.42 | 1.21                | 0.69 | 0.53 | 0.43 | 0.37 |
|               | 0.7        | 1.84                   | 1.28 | 1.04 | 0.90 | 0.79 | 1.22                | 0.70 | 0.53 | 0.44 | 0.37 |
|               | 1.5        | 4.49                   | 2.66 | 2.09 | 1.78 | 1.58 | 1.49                | 0.79 | 0.59 | 0.48 | 0.41 |
| GLMM-C        | 0          | 0.82                   | 0.60 | 0.48 | 0.40 | 0.35 | 0.81                | 0.60 | 0.48 | 0.40 | 0.34 |
|               | 0.2        | 0.83                   | 0.61 | 0.49 | 0.41 | 0.36 | 0.80                | 0.58 | 0.47 | 0.39 | 0.34 |
|               | 0.7        | 0.90                   | 0.67 | 0.54 | 0.45 | 0.39 | 0.77                | 0.57 | 0.45 | 0.38 | 0.33 |
|               | 1.5        | 0.94                   | 0.70 | 0.56 | 0.47 | 0.40 | 0.78                | 0.57 | 0.46 | 0.38 | 0.33 |
| GLMM-CP       | 0          | 0.83                   | 0.61 | 0.49 | 0.41 | 0.35 | 0.82                | 0.60 | 0.48 | 0.40 | 0.34 |
|               | 0.2        | 0.84                   | 0.62 | 0.50 | 0.42 | 0.36 | 0.80                | 0.59 | 0.47 | 0.39 | 0.34 |
|               | 0.7        | 0.92                   | 0.68 | 0.55 | 0.46 | 0.39 | 0.77                | 0.57 | 0.45 | 0.38 | 0.33 |
|               | 1.5        | 0.96                   | 0.71 | 0.57 | 0.47 | 0.40 | 0.78                | 0.57 | 0.46 | 0.39 | 0.33 |
| GEE           | 0          | 0.61                   | 0.48 | 0.41 | 0.35 | 0.31 | 0.60                | 0.46 | 0.39 | 0.34 | 0.31 |
|               | 0.2        | 0.61                   | 0.50 | 0.42 | 0.37 | 0.33 | 0.65                | 0.47 | 0.39 | 0.33 | 0.30 |
|               | 0.7        | 0.67                   | 0.54 | 0.46 | 0.39 | 0.34 | 0.54                | 0.44 | 0.38 | 0.33 | 0.29 |
|               | 1.5        | 0.64                   | 0.50 | 0.42 | 0.36 | 0.32 | 0.57                | 0.45 | 0.38 | 0.33 | 0.29 |
| GEE-FGd5      | 0          | 2.24                   | 0.89 | 0.58 | 0.46 | 0.38 | 2.87                | 0.85 | 0.58 | 0.45 | 0.37 |
|               | 0.2        | 1.66                   | 0.79 | 0.57 | 0.46 | 0.39 | 4.17                | 1.21 | 0.56 | 0.44 | 0.37 |
|               | 0.7        | 1.16                   | 0.77 | 0.59 | 0.48 | 0.40 | 2.96                | 0.87 | 0.63 | 0.43 | 0.35 |
|               | 1.5        | 1.11                   | 0.72 | 0.55 | 0.45 | 0.37 | 2.79                | 1.09 | 0.55 | 0.43 | 0.36 |



**Table S17.** Within-period correlation (WPC) and inter-period correlation (IPC) on the log-odds scale for nonstratified simulation scenarios in Section 3.1. WPC and IPC were calculated as described in Martin et al. (2016) using logistic approximation approach.

| Model | $\sigma$ | $\nu$ | $\lambda$ | Control |       | Intervention |       |
|-------|----------|-------|-----------|---------|-------|--------------|-------|
|       |          |       |           | WPC     | IPC   | WPC          | IPC   |
| (5)   | 0.1      | 0.01  | .         | 0.003   | 0.003 | 0.003        | 0.003 |
|       | 0.1      | 0.1   | .         | 0.006   | 0.003 | 0.006        | 0.003 |
|       | 0.5      | 0.01  | .         | 0.071   | 0.071 | 0.071        | 0.071 |
|       | 0.5      | 0.1   | .         | 0.073   | 0.070 | 0.073        | 0.070 |
| (6)   | 0.1      | 0.1   | 0.1       | 0.006   | 0.003 | 0.009        | 0.006 |
|       | 0.1      | 0.1   | 0.5       | 0.006   | 0.003 | 0.076        | 0.073 |
|       | 0.1      | 0.1   | 1.0       | 0.006   | 0.003 | 0.237        | 0.234 |

**Table S18.** Within-period correlation (WPC) and inter-period correlation (IPC) on the proportion scale for nonstratified simulation scenarios in Section 3.1. WPC and IPC were calculated as described in Martin et al. (2016) using simulation approach adapted from Goldstein et al. (2002).

| Model | $\sigma$ | $\nu$ | $\lambda$ | Control |       | Intervention   |       |                   |       |                  |       |
|-------|----------|-------|-----------|---------|-------|----------------|-------|-------------------|-------|------------------|-------|
|       |          |       |           | WPC     | IPC   | $\theta^* = 0$ |       | $\theta^* = 0.25$ |       | $\theta^* = 0.5$ |       |
|       |          |       |           |         |       | WPC            | IPC   | WPC               | IPC   | WPC              | IPC   |
| (5)   | 0.1      | 0.01  | .         | 0.002   | 0.002 | 0.002          | 0.002 | 0.002             | 0.002 | 0.002            | 0.002 |
|       | 0.1      | 0.1   | .         | 0.004   | 0.002 | 0.004          | 0.002 | 0.004             | 0.002 | 0.004            | 0.002 |
|       | 0.5      | 0.01  | .         | 0.046   | 0.046 | 0.046          | 0.046 | 0.047             | 0.046 | 0.052            | 0.052 |
|       | 0.5      | 0.1   | .         | 0.047   | 0.045 | 0.047          | 0.045 | 0.052             | 0.050 | 0.055            | 0.053 |
| (6)   | 0.1      | 0.1   | 0.1       | 0.004   | 0.002 | 0.005          | 0.003 | 0.006             | 0.004 | 0.007            | 0.005 |
|       | 0.1      | 0.1   | 0.5       | 0.004   | 0.002 | 0.047          | 0.045 | 0.052             | 0.050 | 0.060            | 0.058 |
|       | 0.1      | 0.1   | 1.0       | 0.004   | 0.002 | 0.150          | 0.149 | 0.169             | 0.168 | 0.167            | 0.166 |

## References

- Garthwaite, P. H. (1996). Confidence intervals from randomization tests. *Biometrics* **52**, 1387–1393.
- Garthwaite, P. H. and Jones, M. C. (2009). A stochastic approximation method and its application to confidence intervals. *Journal of Computational and Graphical Statistics* **18**, 184–200.
- Goldstein, H., Browne, W., and Rasbash, J. (2002). Partitioning variation in multilevel models. *Understanding Statistics* **1**, 223–231.
- Hughes, J. P., Heagerty, P. J., Xia, F., and Ren, Y. (2020). Robust inference for the stepped wedge design. *Biometrics* **76**, 119–130.
- Kennedy-Shaffer, L., de Gruttola, V., and Lipsitch, M. (2020). Novel methods for the analysis of stepped wedge cluster randomized trials. *Statistics in Medicine* **39**, 815–844.
- Martin, J., Girling, A., Nirantharakumar, K., Ryan, R., Marshall, T., and Hemming, K. (2016). Intra-cluster and inter-period correlation coefficients for cross-sectional cluster randomised controlled trials for type-2 diabetes in uk primary care. *Trials* **17**, 402.
- Rabideau, D. J. and Wang, R. (2020). Randomization-based confidence intervals for cluster randomized trials. *Biostatistics* kxaa007.
- Thompson, J. A., Davey, C., Fielding, K., Hargreaves, J. R., and Hayes, R. J. (2018). Robust analysis of stepped wedge trials using cluster-level summaries within periods. *Statistics in Medicine* **37**, 2487–2500.
